# Supplementary material for: Under-representation of female athletes in research informing influential concussion consensus and position statements: an evidence review and synthesis
Source: HighWire-hosted journal article supplement (doi:10.1136/bjsports-2021-105045), 2022-07-18
Supplement: bjsports-2021-105045supp001_data_supplement.pdf [file bjsports-2021-105045supp001_data_supplement.pdf]

## Alphabetical (within Statement) Female Athlete Papers Table

| <b>Citation</b>                                                                                                                                                                                                                                                                                                                                                                                                                                             | <b>Statement</b> | <b>Percentage Male Participants</b> | <b>Reference Number</b> | <b>Combined Reference Number</b> |
|-------------------------------------------------------------------------------------------------------------------------------------------------------------------------------------------------------------------------------------------------------------------------------------------------------------------------------------------------------------------------------------------------------------------------------------------------------------|------------------|-------------------------------------|-------------------------|----------------------------------|
| Asken, B. M., Bauer, R. M., Guskiewicz, K. M., McCrema, M. A., Schmidt, J. D., Giza, C. C., et al. (2018). Immediate Removal From Activity After Sport-Related Concussion Is Associated With Shorter Clinical Recovery and Less Severe Symptoms in Collegiate Student-Athletes. <i>The American Journal of Sports Medicine</i> , 46(6), 363546518757984–1474. <a href="http://doi.org/10.1177/0363546518757984">http://doi.org/10.1177/0363546518757984</a> | AMSSM            | 61.71%                              | 92                      | 92                               |
| Asken, B. M., McCrema, M. A., Clugston, J. R., Snyder, A. R., Houck, Z. M., & Bauer, R. M. (2016). "Playing Through It": Delayed Reporting and Removal From Athletic Activity After Concussion Predicts Prolonged Recovery. <i>Journal of Athletic Training</i> , 51(4), 329–335. <a href="http://doi.org/10.4085/1062-6050-51.5.02">http://doi.org/10.4085/1062-6050-51.5.02</a>                                                                           | AMSSM            | 77.32%                              | 93                      | 93                               |
| Barr, W. B., & McCrema, M. (2001). Sensitivity and specificity of standardized neurocognitive testing immediately following sports concussion. <i>Journal of the International Neuropsychological Society</i> , 7(6), 693–702. <a href="http://doi.org/10.1017/s1355617701766052">http://doi.org/10.1017/s1355617701766052</a>                                                                                                                              | AMSSM            | 100.00%                             | 15                      | 15                               |
| Barr, W. B., Pritchep, L. S., Chabot, R., Powell, M. R., & McCrema, M. (2012). Measuring brain electrical activity to track recovery from sport-related concussion. <i>Brain Injury : [BI]</i> , 26(1), 58–66. <a href="http://doi.org/10.3109/02699052.2011.608216">http://doi.org/10.3109/02699052.2011.608216</a>                                                                                                                                        | AMSSM            | 100.00%                             | 16                      | 16                               |
| Black AM, Macpherson AK, Hagel BE, et al. Policy change eliminating body checking in non-elite ice hockey leads to a threefold reduction in injury and concussion risk in 11- and 12-year-old players. <i>British Journal of Sports Medicine</i> . 2016;50(1):55-61. doi:10.1136/bjsports-2015-095103.                                                                                                                                                      | AMSSM            | 96.73%                              | 115                     | 115                              |
| Bretzin, A. C., Covassin, T., Fox, M. E., Petit, K. M., Savage, J. L., Walker, L. F., & Gould, D. (2018). Sex Differences in the Clinical Incidence of Concussions, Missed School Days, and Time Loss in High School Student-Athletes: Part 1. <i>The American Journal of Sports Medicine</i> , 46(9), 2263–2269. <a href="http://doi.org/10.1177/0363546518778251">http://doi.org/10.1177/0363546518778251</a>                                             | AMSSM            | 60.09%                              | 14                      | 14                               |
| Broglio SP, Lapointe A, O'Connor KL, et al. Head impact density: a model to explain the elusive concussion threshold. <i>J Neurotrauma</i> . 2017;34:2675–2683.                                                                                                                                                                                                                                                                                             | AMSSM            | 100.00%                             | 49                      | 49                               |
| Broglio SP, Sosnoff JJ, Ferrara MS. The relationship of athlete-reported concussion symptoms and objective measures of neurocognitive function and postural control. <i>Clin J Sport Med</i> . 2009;19(5):377-382. doi:10.1097/JSM.0b013e3181b625fe.                                                                                                                                                                                                        | AMSSM            | 75.00%                              | 122                     | 122                              |
| Broglio, S. P., Katz, B. P., Zhao, S., McCrema, M., McAllister, T., CARE Consortium Investigators. (2018). Test-Retest Reliability and Interpretation of Common Concussion Assessment Tools: Findings from the NCAA-DoD CARE Consortium. <i>Sports Medicine</i> , 48(5), 1255–1268. <a href="http://doi.org/10.1007/s40279-017-0813-0">http://doi.org/10.1007/s40279-017-0813-0</a>                                                                         | AMSSM            | 58.92%                              | 33                      | 33                               |
| Brooks, M. A., Peterson, K., Biese, K., Sanfilippo, J., Heiderscheit, B. C., & Bell, D. R. (2016). Concussion Increases Odds of Sustaining a Lower Extremity Musculoskeletal Injury After Return to Play Among Collegiate Athletes. <i>The American Journal of Sports Medicine</i> , 44(3), 742–747. <a href="http://doi.org/10.1177/0363546515622387">http://doi.org/10.1177/0363546515622387</a>                                                          | AMSSM            | 77.33%                              | 97                      | 97                               |
| Chin, E. Y., Nelson, L. D., Barr, W. B., McCrory, P., & McCrema, M. A. (2016). Reliability and Validity of the Sport Concussion Assessment Tool-3 (SCAT3) in High School and Collegiate Athletes. <i>The American Journal of Sports Medicine</i> , 44(9), 2276–2285. <a href="http://doi.org/10.1177/0363546516648141">http://doi.org/10.1177/0363546516648141</a>                                                                                          | AMSSM            | 76.91%                              | 23                      | 23                               |

|                                                                                                                                                                                                                                                                                                                                                                                          |       |         |     |     |
|------------------------------------------------------------------------------------------------------------------------------------------------------------------------------------------------------------------------------------------------------------------------------------------------------------------------------------------------------------------------------------------|-------|---------|-----|-----|
| Clausen M, Pendergast DR, Willer B, et al. Cerebral blood flow during treadmill exercise is a marker of physiological postconcussion syndrome in female athletes. <i>J Head Trauma Rehabil.</i> 2016;31:215–224                                                                                                                                                                          | AMSSM | 0.00%   | 68  | 68  |
| Deshpande, S. K., Hasegawa, R. B., Rabinowitz, A. R., Whyte, J., Roan, C. L., Tabatabaei, A., et al. (2017). Association of Playing High School Football With Cognition and Mental Health Later in Life. <i>JAMA Neurology</i> , 74(8), 909–918. <a href="http://doi.org/10.1001/jamaneurol.2017.1317">http://doi.org/10.1001/jamaneurol.2017.1317</a>                                   | AMSSM | 100.00% | 104 | 104 |
| Dhawan, P. S., Leong, D., Tapsell, L., Starling, A. J., Galetta, S. L., Balcer, L. J., et al. (2017). King-Devick Test identifies real-time concussion and asymptomatic concussion in youth athletes. <i>Neurology. Clinical Practice</i> , 7(6), 464–473. <a href="http://doi.org/10.1212/CPJ.0000000000000381">http://doi.org/10.1212/CPJ.0000000000000381</a>                         | AMSSM | 100.00% | 29  | 29  |
| Dompier, T. P., Kerr, Z. Y., Marshall, S. W., Hainline, B., Snook, E. M., Hayden, R., & Simon, J. E. (2015). Incidence of Concussion During Practice and Games in Youth, High School, and Collegiate American Football Players. <i>JAMA Pediatrics</i> , 169(7), 659–665. <a href="http://doi.org/10.1001/jamapediatrics.2015.0210">http://doi.org/10.1001/jamapediatrics.2015.0210</a>  | AMSSM | 75.00%  | 25  | 25  |
| Echlin PS, Tator CH, Cusimano MD, et al. A prospective study of physician-observed concussions during junior ice hockey: implications for incidence rates. <i>Neurosurg Focus.</i> 2010;29(5):E4. doi:10.3171/2010.9.FOCUS10186.                                                                                                                                                         | AMSSM | 100.00% | 121 | 121 |
| Eckner JT, Chandran S, Richardson JK. Investigating the role of feedback and motivation in clinical reaction time assessment. <i>PM R.</i> 2011;3(12):1092-1097. doi:10.1016/j.pmrj.2011.04.022.                                                                                                                                                                                         | AMSSM | 54.84%  | 128 | 128 |
| Eckner, J. T., Kutcher, J. S., Broglio, S. P., & Richardson, J. K. (2013). Effect of sport-related concussion on clinically measured simple reaction time. <i>British Journal of Sports Medicine</i> , 48(2), 112–118. <a href="http://doi.org/10.1136/bjsports-2012-091579">http://doi.org/10.1136/bjsports-2012-091579</a>                                                             | AMSSM | 71.43%  | 47  | 47  |
| Eddy R, Goetschius J, Hertel J, Resch J. Test-Retest Reliability and the Effects of Exercise on the King-Devick Test. <i>Clin J Sport Med.</i> 2020;30(3):239-244. doi:10.1097/JSM.0000000000000586.                                                                                                                                                                                     | AMSSM | 38.10%  | 127 | 127 |
| Elbin, R. J., Sufrinko, A., Schatz, P., French, J., Henry, L., Burkhart, S., et al. (2016). Removal From Play After Concussion and Recovery Time. <i>Pediatrics</i> , 138(3). <a href="http://doi.org/10.1542/peds.2016-0910">http://doi.org/10.1542/peds.2016-0910</a>                                                                                                                  | AMSSM | 73.91%  | 94  | 94  |
| Erickson KI, Voss MW, Prakash RS, et al. Exercise training increases size of hippocampus and improves memory. <i>Proc Natl Acad Sci USA.</i> 2011;108(7):3017-3022. doi:10.1073/pnas.1015950108.                                                                                                                                                                                         | AMSSM | 33.33%  | 70  | 70  |
| Fuller GW, Cross MJ, Stokes KA, et al. King-Devick concussion test performs poorly as a screening tool in elite rugby union players: a prospective cohort study of two screening tests versus a clinical reference standard. <i>Br J Sports Med.</i> 2018. doi:10.1136/bjsports-2017-098560.                                                                                             | AMSSM | 100.00% | 125 | 125 |
| Galetta, K. M., Brandes, L. E., Maki, K., Dziemianowicz, M. S., Laudano, E., Allen, M., et al. (2011). The King-Devick test and sports-related concussion: study of a rapid visual screening tool in a collegiate cohort. <i>Journal of the Neurological Sciences</i> , 309(1-2), 34–39. <a href="http://doi.org/10.1016/j.jns.2011.07.039">http://doi.org/10.1016/j.jns.2011.07.039</a> | AMSSM | 83.11%  | 27  | 27  |
| Galetta, K. M., Morganroth, J., Moehringer, N., Mueller, B., Hasanaj, L., Webb, N., et al. (2015). Adding Vision to Concussion Testing: A Prospective Study of Sideline Testing in                                                                                                                                                                                                       | AMSSM | 81.63%  | 21  | 21  |

|                                                                                                                                                                                                                                                                                                                                                                                                          |       |         |     |     |
|----------------------------------------------------------------------------------------------------------------------------------------------------------------------------------------------------------------------------------------------------------------------------------------------------------------------------------------------------------------------------------------------------------|-------|---------|-----|-----|
| Youth and Collegiate Athletes. <i>Journal of Neuro-Ophthalmology</i> :35(3), 235–241. <a href="http://doi.org/10.1097/WNO.000000000000226">http://doi.org/10.1097/WNO.000000000000226</a>                                                                                                                                                                                                                |       |         |     |     |
| Garcia, G.-G. P., Broglio, S. P., Lavieri, M. S., McCrea, M., McAllister, T., CARE Consortium Investigators. (2018). Quantifying the Value of Multidimensional Assessment Models for Acute Concussion: An Analysis of Data from the NCAA-DoD Care Consortium. <i>Sports Medicine</i> , 48(7), 1739–1749. <a href="http://doi.org/10.1007/s40279-018-0880-x">http://doi.org/10.1007/s40279-018-0880-x</a> | AMSSM | 61.52%  | 40  | 40  |
| Grool AM, Aglipay M, Momoli F, et al. Association Between Early Participation in Physical Activity Following Acute Concussion and Persistent Postconcussive Symptoms in Children and Adolescents. <i>JAMA</i> . 2016;316(23):2504-2514. doi:10.1001/jama.2016.17396.                                                                                                                                     | AMSSM | 60.71%  | 66  | 66  |
| Hecimovich M, King D, Dempsey AR, Murphy M. The King-Devick test is a valid and reliable tool for assessing sport-related concussion in Australian football: A prospective cohort study. <i>J Sci Med Sport</i> . 2018;21(10):1004-1007. doi:10.1016/j.jsams.2018.03.011.                                                                                                                                | AMSSM | 100.00% | 126 | 126 |
| Herman, D. C., Jones, D., Harrison, A., Moser, M., Tillman, S., Farmer, K., et al. (2017). Concussion May Increase the Risk of Subsequent Lower Extremity Musculoskeletal Injury in Collegiate Athletes. <i>Sports Medicine</i> , 47(5), 1003–1010. <a href="http://doi.org/10.1007/s40279-016-0607-9">http://doi.org/10.1007/s40279-016-0607-9</a>                                                      | AMSSM | 71.23%  | 98  | 98  |
| Hoffman, N. L., Weber, M. L., Broglio, S. P., McCrea, M., McAllister, T. W., & Schmidt, J. D. (2017). Influence of Postconcussion Sleep Duration on Concussion Recovery in Collegiate Athletes. <i>Clinical Journal of Sport Medicine</i> , Publish Ahead of Print, 1–7. <a href="http://doi.org/10.1097/JSM.0000000000000538">http://doi.org/10.1097/JSM.0000000000000538</a>                           | AMSSM | 56.29%  | 85  | 85  |
| Houck, Z., Asken, B., Bauer, R., Pothast, J., Michaudet, C., & Clugston, J. (2016). Epidemiology of Sport-Related Concussion in an NCAA Division I Football Bowl Subdivision Sample. <i>The American Journal of Sports Medicine</i> , 44(9), 2269–2275. <a href="http://doi.org/10.1177/0363546516645070">http://doi.org/10.1177/0363546516645070</a>                                                    | AMSSM | 100.00% | 26  | 26  |
| Howell, D. R., O'Brien, M. J., Fraser, J., & Meehan, W. P. (2018). Continuing Play, Symptom Severity, and Symptom Duration After Concussion in Youth Athletes. <i>Clinical Journal of Sport Medicine</i> , Publish Ahead of Print, 1–5. <a href="http://doi.org/10.1097/JSM.0000000000000570">http://doi.org/10.1097/JSM.0000000000000570</a>                                                            | AMSSM | 64.97%  | 95  | 95  |
| Hugentobler JA, Vegh M, Janiszewski B, et al. Physical therapy intervention strategies for patients with prolonged mild traumatic brain injury symptoms: A case series. <i>Int J Sports Phys Ther</i> 2015;10:676–89                                                                                                                                                                                     | AMSSM | 66.67%  | 84  | 84  |
| Janssen PH, Mandrekar J, Mielke MM, et al. High school football and late-life risk of neurodegenerative syndromes, 1956–1970. <i>Mayo Clin Proc</i> . 2017;92:66–71.                                                                                                                                                                                                                                     | AMSSM | 100.00% | 109 | 109 |
| Kerr ZY, Yeargin S, Valovich McLeod TC, et al. Comprehensive Coach Education and Practice Contact Restriction Guidelines Result in Lower Injury Rates in Youth American Football. <i>Orthop J Sports Med</i> . 2015;3(7):232596711559457-232596711559458. doi:10.1177/2325967115594578.                                                                                                                  | AMSSM | 100.00% | 118 | 118 |
| Kerr ZY, Yeargin SW, Valovich McLeod TC, Mensch J, Hayden R, Dompier TP. Comprehensive Coach Education Reduces Head Impact Exposure in American Youth Football. <i>Orthop J Sports Med</i> . 2015;3(10):2325967115610545. doi:10.1177/2325967115610545.                                                                                                                                                  | AMSSM | 100.00% | 119 | 119 |
| Kerr, Z. Y., Evenson, K. R., Rosamond, W. D., Mihalik, J. P., Guskiewicz, K. M., & Marshall, S. W. (2014). Association between concussion and mental health in former collegiate athletes. <i>Injury Epidemiology</i> , 1(1), 28. <a href="http://doi.org/10.1186/s40621-014-0028-x">http://doi.org/10.1186/s40621-014-0028-x</a>                                                                        | AMSSM | 47.18%  | 101 | 101 |
| Kerr, Z. Y., Roos, K. G., Djoko, A., Dalton, S. L., Broglio, S. P., Marshall, S. W., & Dompier, T. P. (2017). Epidemiologic Measures for Quantifying the Incidence of Concussion in                                                                                                                                                                                                                      | AMSSM | 70.77%  | 12  | 12  |

|                                                                                                                                                                                                                                                                                                                                                                                                                                                         |       |         |     |     |
|---------------------------------------------------------------------------------------------------------------------------------------------------------------------------------------------------------------------------------------------------------------------------------------------------------------------------------------------------------------------------------------------------------------------------------------------------------|-------|---------|-----|-----|
| National Collegiate Athletic Association Sports. Journal of Athletic Training, 52(3), 167–174. <a href="http://doi.org/10.4085/1062-6050-51.6.05">http://doi.org/10.4085/1062-6050-51.6.05</a>                                                                                                                                                                                                                                                          |       |         |     |     |
| King, D., Gissane, C., Hume, P. A., & Flaws, M. (2015). The King–Devick test was useful in management of concussion in amateur rugby union and rugby league in New Zealand. <i>Journal of the neurological sciences</i> , 351(1-2), 58–64.                                                                                                                                                                                                              | AMSSM | 100.00% | 124 | 124 |
| Krolikowski MP, Black AM, Palacios-Derflingher L, Blake TA, Schneider KJ, Emery CA. The Effect of the “Zero Tolerance for Head Contact” Rule Change on the Risk of Concussions in Youth Ice Hockey Players. <i>Am J Sports Med</i> . 2017;45(2):468-473. doi:10.1177/0363546516669701.                                                                                                                                                                  | AMSSM | 96.71%  | 116 | 116 |
| Lawrence DW, Richards D, Comper P, Hutchison MG. Earlier time to aerobic exercise is associated with faster recovery following acute sport concussion. Janigro D, ed. <i>PLoS ONE</i> . 2018;13(4):e0196062–12. doi:10.1371/journal.pone.0196062.                                                                                                                                                                                                       | AMSSM | 58.50%  | 71  | 71  |
| Leddy JJ, Haider MN, Hinds AL, Darling S, Willer BS. A Preliminary Study of the Effect of Early Aerobic Exercise Treatment for Sport-Related Concussion in Males. <i>Clin J Sport Med</i> . 2019;29(5):353-360. doi:10.1097/JSM.0000000000000663.                                                                                                                                                                                                       | AMSSM | 100.00% | 72  | 72  |
| Leddy, J. J., Hinds, A. L., Miecznikowski, J., Darling, S., Matuszak, J., Baker, J. G., et al. (2018). Safety and Prognostic Utility of Provocative Exercise Testing in Acutely Concussed Adolescents: A Randomized Trial. <i>Clinical Journal of Sport Medicine : Official Journal of the Canadian Academy of Sport Medicine</i> , 28(1), 13–20. <a href="http://doi.org/10.1097/JSM.0000000000000431">http://doi.org/10.1097/JSM.0000000000000431</a> | AMSSM | 68.52%  | 58  | 58  |
| Lehman EJ, Hein MJ, Gersic CM. Suicide mortality among retired National Football League players who played 5 or more seasons. <i>Am J Sports Med</i> . 2016;44:2486–2491.                                                                                                                                                                                                                                                                               | AMSSM | 100.00% | 103 | 103 |
| Leong DF, Balcer LJ, Galetta SL, et al. The King-Devick test for sideline concussion screening in collegiate football. <i>J Optim</i> . 2015;8:131–139.                                                                                                                                                                                                                                                                                                 | AMSSM | 93.70%  | 28  | 28  |
| Leong DF, Balcer LJ, Galetta SL, Liu Z, Master CL. The King-Devick test as a concussion screening tool administered by sports parents. <i>J Sports Med Phys Fitness</i> . 2014;54(1):70–77.                                                                                                                                                                                                                                                             | AMSSM | 100.00% | 123 | 123 |
| Marinides, Z., Galetta, K. M., Andrews, C. N., Wilson, J. A., Herman, D. C., Robinson, C. D., et al. (2015). Vision testing is additive to the sideline assessment of sports-related concussion. <i>Neurology. Clinical Practice</i> , 5(1), 25–34. <a href="http://doi.org/10.1212/CPJ.0000000000000060">http://doi.org/10.1212/CPJ.0000000000000060</a>                                                                                               | AMSSM | 67.87%  | 20  | 20  |
| Maugans, T. A., Farley, C., Altaye, M., Leach, J., & Cecil, K. M. (2012). Pediatric sports-related concussion produces cerebral blood flow alterations. <i>Pediatrics</i> , 129(1), 28–37. <a href="http://doi.org/10.1542/peds.2011-2083">http://doi.org/10.1542/peds.2011-2083</a>                                                                                                                                                                    | AMSSM | 75.00%  | 6   | 6   |
| McCrea M, Guskiewicz K, Randolph C, et al. Incidence, clinical course, and predictors of prolonged recovery time following sport-related concussion in high school and college athletes. <i>J Int Neuropsychol Soc</i> . 2013;19:22–33.                                                                                                                                                                                                                 | AMSSM | 88.95%  | 55  | 55  |
| McCrea, M., Guskiewicz, K., Randolph, C., Barr, W. B., Hammeke, T. A., Marshall, S. W., & Kelly, J. P. (2009). Effects of a symptom-free waiting period on clinical outcome and risk of reinjury after sport-related concussion. <i>Neurosurgery</i> , 65(5), 876–82– discussion 882–3. <a href="http://doi.org/10.1227/01.NEU.0000350155.89800.00">http://doi.org/10.1227/01.NEU.0000350155.89800.00</a>                                               | AMSSM | 88.50%  | 96  | 96  |
| McCrea, M., Kelly, J. P., Randolph, C., Cisler, R., & Berger, L. (2002). Immediate neurocognitive effects of concussion. <i>Neurosurgery</i> , 50(5), 1032–40– discussion 1040–2. <a href="http://doi.org/10.1097/00006123-200205000-00017">http://doi.org/10.1097/00006123-200205000-00017</a>                                                                                                                                                         | AMSSM | 100.00% | 17  | 17  |

|                                                                                                                                                                                                                                                                                                                                                                                                                                                                                                              |       |         |     |     |
|--------------------------------------------------------------------------------------------------------------------------------------------------------------------------------------------------------------------------------------------------------------------------------------------------------------------------------------------------------------------------------------------------------------------------------------------------------------------------------------------------------------|-------|---------|-----|-----|
| McKee AC, Stein TD, Nowinski CJ, et al. The spectrum of disease in chronic traumatic encephalopathy. <i>Brain</i> . 2013;136:43–64.                                                                                                                                                                                                                                                                                                                                                                          | AMSSM | 100.00% | 106 | 106 |
| Meier, T. B., Bellgowan, P. S. F., Singh, R., Kuplicki, R., Polanski, D. W., & Mayer, A. R. (2015). Recovery of cerebral blood flow following sports-related concussion. <i>JAMA Neurology</i> , 72(5), 530–538. <a href="http://doi.org/10.1001/jamaneurol.2014.4778">http://doi.org/10.1001/jamaneurol.2014.4778</a>                                                                                                                                                                                       | AMSSM | 100.00% | 7   | 7   |
| Mucha, A., Collins, M. W., Elbin, R. J., Furman, J. M., Troutman-Enseki, C., DeWolf, R. M., et al. (2014). A Brief Vestibular/Ocular Motor Screening (VOMS) Assessment to Evaluate Concussions. <i>The American Journal of Sports Medicine</i> , 42(10), 2479–2486. <a href="http://doi.org/10.1177/0363546514543775">http://doi.org/10.1177/0363546514543775</a>                                                                                                                                            | AMSSM | 56.25%  | 46  | 46  |
| Norheim, N., Kissinger-Knox, A., Cheatham, M., & Webbe, F. (2018). Performance of college athletes on the 10-item word list of SCAT5. <i>BMJ Open Sport &amp; Exercise Medicine</i> , 4(1), e000412. <a href="http://doi.org/10.1136/bmjsem-2018-000412">http://doi.org/10.1136/bmjsem-2018-000412</a>                                                                                                                                                                                                       | AMSSM | 64.01%  | 43  | 43  |
| Oliver JM, Jones MT, Kirk KM, et al. Effect of docosahexaenoic acid on a biomarker of head trauma in American football. <i>Med Sci Sports Exerc</i> . 2016;48:974–982.                                                                                                                                                                                                                                                                                                                                       | AMSSM | 100.00% | 76  | 76  |
| Putukian, M., Echemendia, R., Dettwiler-Danspeckgruber, A., Duliba, T., Bruce, J., Furtado, J. L., & Murugavel, M. (2015). Prospective clinical assessment using Sideline Concussion Assessment Tool-2 testing in the evaluation of sport-related concussion in college athletes. <i>Clinical Journal of Sport Medicine : Official Journal of the Canadian Academy of Sport Medicine</i> , 25(1), 36–42. <a href="http://doi.org/10.1097/JSM.000000000000102">http://doi.org/10.1097/JSM.000000000000102</a> | AMSSM | 66.92%  | 22  | 22  |
| Resch JE, Brown CN, Schmidt J, et al. The sensitivity and specificity of clinical measures of sport concussion: three tests are better than one. <i>BMJ Open Sport Exerc Med</i> . 2016;2:e000012.                                                                                                                                                                                                                                                                                                           | AMSSM | 72.50%  | 120 | 120 |
| Savica R, Parisi JE, Wold LE, et al. High school football and risk of neurodegeneration: a community-based study. <i>Mayo Clin Proc</i> . 2012; 87:335–340.                                                                                                                                                                                                                                                                                                                                                  | AMSSM | 100.00% | 108 | 108 |
| Schneider KJ, Meeuwisse WH, Nettel-Aguirre A, et al. Cervicovestibular rehabilitation in sport-related concussion: a randomised controlled trial. <i>Br J Sports Med</i> 2014;48:1294–8.                                                                                                                                                                                                                                                                                                                     | AMSSM | 58.06%  | 83  | 83  |
| Seidman, D. H., Burlingame, J., Yousif, L. R., Donahue, X. P., Krier, J., Rayes, L. J., et al. (2015). Evaluation of the King-Devick test as a concussion screening tool in high school football players. <i>Journal of the Neurological Sciences</i> , 356(1-2), 97–101. <a href="http://doi.org/10.1016/j.jns.2015.06.021">http://doi.org/10.1016/j.jns.2015.06.021</a>                                                                                                                                    | AMSSM | 100.00% | 24  | 24  |
| Stein TD, Alvarez VE, McKee AC. Chronic traumatic encephalopathy: a spectrum of neuropathological changes following repetitive brain trauma in athletes and military personnel. <i>Alzheimers Res Ther</i> . 2014;6(1):4-11. doi:10.1186/alzrt234.                                                                                                                                                                                                                                                           | AMSSM | 100.00% | 107 | 107 |
| Thomas DG, Apps JN, Hoffmann RG, McCrea M, Hammeke T. Benefits of strict rest after acute concussion: a randomized controlled trial. <i>Pediatrics</i> . 2015;135(2):213-223. doi:10.1542/peds.2014-0966.                                                                                                                                                                                                                                                                                                    | AMSSM | 65.66%  | 65  | 65  |
| Tsushima, W. T., Siu, A. M., Ahn, H. J., Chang, B. L., & Murata, N. M. (2019). Incidence and Risk of Concussions in Youth Athletes: Comparisons of Age, Sex, Concussion History, Sport, and Football Position. <i>Archives of Clinical Neuropsychology : the Official Journal of the National Academy of Neuropsychologists</i> , 34(1), 60–69. <a href="http://doi.org/10.1093/arclin/acy019">http://doi.org/10.1093/arclin/acy019</a>                                                                      | AMSSM | 57.46%  | 13  | 13  |
| Tucker, R., Raftery, M., Fuller, G. W., Hester, B., Kemp, S., & Cross, M. J. (2017). A video analysis of head injuries satisfying the criteria for a head injury assessment in professional Rugby Union: a prospective cohort study. <i>British Journal of Sports Medicine</i> , 51(15), 1147–1151. <a href="http://doi.org/10.1136/bjsports-2017-097883">http://doi.org/10.1136/bjsports-2017-097883</a>                                                                                                    | AMSSM | 100.00% | 35  | 35  |

|                                                                                                                                                                                                                                                                                                                                                                                       |       |         |     |     |
|---------------------------------------------------------------------------------------------------------------------------------------------------------------------------------------------------------------------------------------------------------------------------------------------------------------------------------------------------------------------------------------|-------|---------|-----|-----|
| Zemek, R., Barrowman, N., Freedman, S. B., Gravel, J., Gagnon, I., McGahern, C., et al. (2016). Clinical Risk Score for Persistent Postconcussion Symptoms Among Children With Acute Concussion in the ED. <i>JAMA: the Journal of the American Medical Association</i> , 315(10), 1014–12. <a href="http://doi.org/10.1001/jama.2016.1203">http://doi.org/10.1001/jama.2016.1203</a> | AMSSM | 60.99%  | 56  | 56  |
| Bleiberg J, Cernich AN, Cameron K, et al. Duration of cognitive impairment after sports concussion. <i>Neurosurgery</i> 2004;54:1073–78–78–80.                                                                                                                                                                                                                                        | ICCCS | 100.00% | 18  | 146 |
| Collie A, Maruff P, McStephen M, et al. Psychometric issues associated with computerised neuropsychological assessment of concussed athletes. <i>Br J Sports Med</i> 2003;37:556–9.                                                                                                                                                                                                   | ICCCS | 100.00% | 14  | 142 |
| Collins MW, Grindel SH, Lovell MR, et al. Relationship between concussion and neuropsychological performance in college football players. <i>Jama</i> 1999;282:964–70                                                                                                                                                                                                                 | ICCCS | 100.00% | 15  | 143 |
| Delaney J, Lacroix V, Leclerc S, et al. Canadian football league season.. <i>Clin J Sport Med</i> 1997;2000:9–14.                                                                                                                                                                                                                                                                     | ICCCS | 100.00% | 28  | 156 |
| Delaney JS, Lacroix VJ, Leclerc S, et al. Concussions among university football and soccer players. <i>Clin J Sport Med</i> 2002;12:331–8.                                                                                                                                                                                                                                            | ICCCS | 78.85%  | 29  | 157 |
| Gioia G, Janusz J, Gilstein K, et al. Neuropsychological management of concussion in children and adolescents: effects of age and gender on ImPact. abstract). <i>Br J Sp Med</i> 2004;38:657.                                                                                                                                                                                        | ICCCS | 71.02%  | 22  | 150 |
| Guilmette TJ, Malia LA, McQuiggan MD. Concussion understanding and management among new England high school football coaches. <i>Brain Inj</i> 2007;21:1039–47.                                                                                                                                                                                                                       | ICCCS | 100.00% | 33  | 161 |
| Johnston KM, Lassonde M, Ptito A. A contemporary neurosurgical approach to sport-related head injury: the McGill concussion protocol. <i>J Am Coll Surg</i> 2001;192:515–24.                                                                                                                                                                                                          | ICCCS | 73.33%  | 27  | 155 |
| Kashluba S, Paniak C, Blake T, et al. A longitudinal, controlled study of patient complaints following treated mild traumatic brain injury. <i>Arch Clin Neuropsychol</i> 2004;19:805–16.                                                                                                                                                                                             | ICCCS | 43.64%  | 38  | 166 |
| Kaut KP, DePompei R, Kerr J, et al. Reports of head injury and symptom knowledge among college athletes: implications for assessment and educational intervention. <i>Clin J Sport Med</i> 2003;13:213–21.                                                                                                                                                                            | ICCCS | 66.04%  | 40  | 168 |
| Maddocks D, Dicker G. An objective measure of recovery from concussion in Australian rules footballers. <i>Sport Health</i> 1989;7:6–7.                                                                                                                                                                                                                                               | ICCCS | 100.00% | 6   | 134 |
| McCrea, M., Kelly, J. P., Kluge, J., Ackley, B., & Randolph, C. (1997). Standardized assessment of concussion in football players. <i>Neurology</i> , 48(3), 586-588.                                                                                                                                                                                                                 | ICCCS | 100.00% | 11  | 139 |
| Barbic D, Pater J, Brison RJ. Comparison of mouth guard designs and concussion prevention in contact sports: a multicenter randomized controlled trial. <i>Clin J Sport Med</i> . 2005;15(5):294–298                                                                                                                                                                                  | NATA  | 80.96%  | 136 | 310 |
| Bazarian JJ, Zhu T, Blyth B, Borrino A, Zhong J. Subject-specific changes in brain white matter on diffusion tensor imaging after sports-related concussion. <i>Magn Reson Imaging</i> . 2012;30(2):171–                                                                                                                                                                              | NATA  | 100.00% | 191 | 365 |
| Breedlove EL, Robinson M, Talavage TM, et al. Biomechanical correlates of symptomatic and asymptomatic neurophysiological impairment in high school football. <i>J Biomech</i> . 2012;45(7):1265– 1272.                                                                                                                                                                               | NATA  | 100.00% | 189 | 363 |
| Broglio SP, Eckner JT, Surma T, Kutcher JS. Post-concussion cognitive declines and symptomatology are not related to concussion biomechanics in high school football players. <i>J Neurotrauma</i> . 2011;28(10):2061–2068.                                                                                                                                                           | NATA  | 100.00% | 128 | 302 |

|                                                                                                                                                                                                                                |            |         |        |     |
|--------------------------------------------------------------------------------------------------------------------------------------------------------------------------------------------------------------------------------|------------|---------|--------|-----|
| Broglio SP, Ferrara MS, Piland SG, Anderson RB, Collie A. Concussion history is not a predictor of computerized neurocognitive performance. <i>Br J Sports Med.</i> 2006;40(9):802–805.                                        | NATA       | 81.56%  | 184    | 358 |
| Broglio SP, Ferrara MS, Sopiartz K, Kelly MS. Reliable change of the sensory organization test. <i>Clin J Sport Med.</i> 2008;18(2):148–154.                                                                                   | NATA       | 68.99%  | 102    | 276 |
| Broglio SP, Macciocchi SN, Ferrara MS. Neurocognitive performance of concussed athletes when symptom free. <i>J Athl Train.</i> 2007;42(4):504–508.                                                                            | ICCCS/NATA | 76.19%  | 20/118 | 292 |
| Broglio SP, Macciocchi SN, Ferrara MS. Sensitivity of the concussion assessment battery. <i>Neurosurgery.</i> 2007;60(6):1050–7-8                                                                                              | ICCCS/NATA | 82.67%  | 21/19  | 193 |
| Broglio SP, Monk A, Sopiartz K, Cooper ER. The influence of ankle support on postural control. <i>J Sci Med Sport.</i> 2009;12(3):388–392.                                                                                     | NATA       | 36.84%  | 108    | 282 |
| Broglio SP, Pontifex MB, O'Connor P, Hillman CH. The persistent effects of concussion on neuroelectric indices of attention. <i>J Neurotrauma.</i> 2009;26(9):1463–1470.                                                       | NATA       | 72.22%  | 192    | 366 |
| Broglio SP, Schnebel B, Sosnoff JJ, et al. Biomechanical properties of concussions in high school football. <i>Med Sci Sports Exerc.</i> 2010;42(11):2064–2071.                                                                | NATA       | 100.00% | 126    | 300 |
| Broglio SP, Zhu W, Sopiartz K, Park Y. Generalizability theory analysis of balance error scoring system reliability in healthy young adults. <i>J Athl Train.</i> 2009;44(5):497–502.                                          | NATA       | 52.08%  | 105    | 279 |
| Catena RD, Van Donkelaar P, Chou LS. Cognitive task effects on gait stability following concussion. <i>Exp Brain Res.</i> 2007;176(1):23–31.                                                                                   | NATA       | 57.14%  | 96     | 270 |
| Collie A, Maruff P, Makdissi M, McCrory P, McStephen M, Darby D. CogSport: reliability and correlation with conventional cognitive tests used in postconcussion medical evaluations. <i>Clin J Sport Med.</i> 2003;13(1):28–32 | NATA       | 100.00% | 84     | 258 |
| Collie A, McCrory P, Makdissi M. Does history of concussion affect current cognitive status? <i>Br J Sports Med.</i> 2006;40(6):550–551.                                                                                       | NATA       | 100.00% | 185    | 359 |
| Covassin T, Elbin RJ, Harris W, Parker T, Kontos A. The role of age and sex in symptoms, neurocognitive performance, and postural stability in athletes after concussion. <i>Am J Sports Med.</i> 2012;40(6):1303–1312.        | NATA       | 70.72%  | 132    | 306 |
| Davidson JA. Epidemiology and outcome of bicycle injuries presenting to an emergency department in the United Kingdom. <i>Eur J Emerg Med.</i> 2005;12(1):24–29.                                                               | NATA       | 65.53%  | 35     | 209 |
| De Beaumont L, Theoret H, Mongeon D, et al. Brain function decline in healthy retired athletes who sustained their last sports concussion in early adulthood. <i>Brain.</i> 2009;132(pt 3):695–708.                            | NATA       | 100.00% | 187    | 361 |
| De Monte VE, Geffen GM, May CR, McFarland K, Heath P, Neralic M. The acute effects of mild traumatic brain injury on finger tapping with and without word repetition. <i>J Clin Exp Neuropsychol.</i> 2005;27(2):224–239.      | NATA       | 69.23%  | 101    | 275 |
| Delaney JS, Al-Kashmiri A, Drummond R, Correa JA. The effect of protective headgear on head injuries and concussions in adolescent football (soccer) players. <i>Br J Sports Med.</i> 2008;42(2):110–115.                      | NATA       | 50.00%  | 149    | 323 |
| Elbin RJ, Schatz P, Covassin T. One-year test-retest reliability of the online version of ImPACT in high school athletes. <i>Am J Sports Med.</i> 2011;39(11):2319–2324.                                                       | NATA       | 45.53%  | 83     | 257 |
| Elleberg D, Leclerc S, Couture S, Daigle C. Prolonged neuropsychological impairments following a first concussion in female university soccer athletes. <i>Clin J Sport Med.</i> 2007;17(5):369–374.                           | NATA       | 0.00%   | 188    | 362 |

|                                                                                                                                                                                                              |            |         |        |     |
|--------------------------------------------------------------------------------------------------------------------------------------------------------------------------------------------------------------|------------|---------|--------|-----|
| Fazio VC, Lovell MR, Pardini JE, Collins MW. The relation between post concussion symptoms and neurocognitive performance in concussed athletes. <i>NeuroRehabilitation</i> . 2007;22(3):207–216.            | NATA       | 68.75%  | 119    | 293 |
| Field M, Collins MW, Lovell MR, Maroon J. Does age play a role in recovery from sports-related concussion? A comparison of high school and collegiate athletes. <i>J Pediatr</i> . 2003;142(5):546–553.      | NATA       | 96.04%  | 36     | 210 |
| Finch C, Braham R, McIntosh A, McCrory P, Wolfe R. Should football players wear custom fitted mouthguards? Results from a group randomised controlled trial. <i>Inj Prev</i> . 2005;11(4):242–246.           | NATA       | 100.00% | 137    | 311 |
| Fox ZG, Mihalik JP, Blackburn JT, Battaglini CL, Guskiewicz KM. Return of postural control to baseline after anaerobic and aerobic exercise protocols. <i>J Athl Train</i> . 2008;43(5):456–463.             | NATA       | 50.00%  | 107    | 281 |
| Gaetz M, Goodman D, Weinberg H. Electrophysiological evidence for the cumulative effects of concussion. <i>Brain Inj</i> . 2000;14(12):1077–1088.                                                            | NATA       | 100.00% | 194    | 368 |
| Gessel LM, Fields SK, Collins CL, Dick RW, Comstock RD. Concussions among United States high school and collegiate athletes. <i>J Athl Train</i> . 2007;42(4):495–503.                                       | NATA       | 72.44%  | 67     | 241 |
| Greenwald RM, Gwin JT, Chu JJ, Crisco JJ. Head impact severity measures for evaluating mild traumatic brain injury risk exposure. <i>Neurosurgery</i> . 2008;62(4):789–798.                                  | NATA       | 100.00% | 125    | 299 |
| Guskiewicz KM, Marshall SW, Bailes J, et al. Association between recurrent concussion and late-life cognitive impairment in retired professional football players. <i>Neurosurgery</i> . 2005;57(4):719–726. | NATA       | 100.00% | 52     | 226 |
| Guskiewicz KM, Marshall SW, Bailes J, et al. Recurrent concussion and risk of depression in retired professional football players. <i>Med Sci Sports Exerc</i> . 2007;39(6):9                                | AMSSM/NATA | 100.00% | 102/51 | 221 |
| Guskiewicz KM, Ross SE, Marshall SW. Postural stability and neuropsychological deficits after concussion in collegiate athletes. <i>J Athl Train</i> . 2001;36(3):263–273                                    | NATA       | 69.44%  | 100    | 274 |
| Hagel BE, Pless IB, Goulet C, Platt RW, Robitaille Y. Effectiveness of helmets in skiers and snowboarders: case-control and case crossover study. <i>BMJ</i> . 2005;330(7486):281.                           | NATA       | 46.94%  | 30     | 204 |
| Hinton-Bayre AD, Geffen G. Severity of sports-related concussion and neuropsychological test performance. <i>Neurology</i> . 2002;59(7):1068–1070.                                                           | NATA       | 100.00% | 129    | 303 |
| Hunt TN, Ferrara MS. Age-related differences in neuropsychological testing among high school athletes. <i>J Athl Train</i> 2009;44(4):405–409.                                                               | NATA       | 100.00% | 16     | 190 |
| Iverson GL, Brooks BL, Ashton VL, Lange RT. Interview versus questionnaire symptom reporting in people with the postconcussion syndrome. <i>J Head Trauma Rehabil</i> . 2010;25(1):23–30.                    | NATA       | 57.38%  | 90     | 264 |
| Iverson GL, Brooks BL, Lovell MR, Collins MW. No cumulative effects for one or two previous concussions. <i>Br J Sports Med</i> . 2006;40(1):72–75.                                                          | NATA       | 100.00% | 186    | 360 |
| Kahanov L, Dusa MJ, Wilkinson S, Roberts J. Self-reported headgear use and concussions among collegiate men's rugby union players. <i>Res Sports Med</i> . 2005;13(2):77–89.                                 | NATA       | 100.00% | 145    | 319 |
| Kemp SP, Hudson Z, Brooks JH, Fuller CW. The epidemiology of head injuries in English professional rugby union. <i>Clin J Sport Med</i> . 2008;18(3):227–234.                                                | NATA       | 100.00% | 143    | 317 |
| Labella CR, Smith BW, Sigurdsson A. Effect of mouthguards on dental injuries and concussions in college basketball. <i>Med Sci Sports Exerc</i> . 2002;34(1):41–44.                                          | NATA       | 100.00% | 141    | 315 |
| Lovell MR, Collins MW, Iverson GL, Johnston KM, Bradley JP. Grade 1 or "ding" concussions in high school athletes. <i>Am J Sports Med</i> . 2004;32(1):47–54.                                                | NATA       | 81.40%  | 18/9   | 183 |



|                                                                                                                                                                                                                                                                                                                           |            |         |       |     |
|---------------------------------------------------------------------------------------------------------------------------------------------------------------------------------------------------------------------------------------------------------------------------------------------------------------------------|------------|---------|-------|-----|
| Lovell MR, Iverson GL, Collins MW, et al. Measurement of symptoms following sports-related concussion: reliability and normative data for the post-concussion scale. <i>Appl Neuropsychol</i> . 2006;13(3):166–174.                                                                                                       | NATA       | 79.67%  | 173   | 347 |
| Maddocks DL, Dicker GD, Saling MM. The assessment of orientation following concussion in athletes. <i>Clin J Sport Med</i> . 1995;5(1):32–35.                                                                                                                                                                             | ICCCS/NATA | 100.00% | 7/111 | 285 |
| Majerske CW, Mihalik JP, Ren D, et al. Concussion in sports: postconcussive activity levels, symptoms, and neurocognitive performance. <i>J Athl Train</i> . 2008;43(3):265–274.                                                                                                                                          | NATA       | 84.21%  | 130   | 304 |
| Marshall SW, Loomis DP, Waller AE, et al. Evaluation of protective equipment for prevention of injuries in rugby union. <i>Int J Epidemiol</i> . 2005;34(1):113–118.                                                                                                                                                      | NATA       | 73.39%  | 139   | 313 |
| Martini DN, Sabin MJ, DePesa SA, et al. The chronic effects of concussion on gait. <i>Arch Phys Med Rehabil</i> . 2011;92(4):585–589.                                                                                                                                                                                     | NATA       | 54.41%  | 197   | 371 |
| McCrea M, Barr WB, Guskiewicz K, et al. Standard regression-based methods for measuring recovery after sport-related concussion. <i>J Int Neuropsychol Soc</i> . 2005;11(1):58–69.                                                                                                                                        | AMSSM/NATA | 100.00% | 20/19 | 194 |
| McCrea M, Guskiewicz KM, Marshall SW, et al. Acute effects and recovery time following concussion in collegiate football players: the NCAA concussion study. <i>JAMA</i> . 2003;290(19):2556–2563.                                                                                                                        | NATA       | 100.00% | 65    | 239 |
| McCrea M, Hammeke T, Olsen G, Leo P, Guskiewicz K. Unreported concussion in high school football players: implications for prevention. <i>Clin J Sport Med</i> . 2004;14(1):13–17.                                                                                                                                        | NATA       | 100.00% | 57    | 231 |
| McCrea M. Standardized mental status testing on the sideline after sport-related concussion. <i>J Athl Train</i> . 2001;36(3):274–279.                                                                                                                                                                                    | AMSSM/NATA | 100.00% | 18/22 | 196 |
| McGrath N, Dinn WM, Collins MW, Lovell MR, Elbin RJ, Kontos AP. Post-exertion neurocognitive test failure among student-athletes following concussion. <i>Brain Inj</i> . 2013;27(1):103–113.                                                                                                                             | NATA       | 79.63%  | 134   | 308 |
| McIntosh AS, McCrory P. Effectiveness of headgear in a pilot study of under 15 rugby union football. <i>Br J Sports Med</i> . 2001;35(3):167–169.                                                                                                                                                                         | NATA       | 100.00% | 144   | 318 |
| Mihalik JP, McCaffrey MA, Rivera EM, et al. Effectiveness of mouthguards in reducing neurocognitive deficits following sports-related cerebral concussion. <i>Dent Traumatol</i> . 2007;23(1):14–20.                                                                                                                      | NATA       | 84.44%  | 142   | 316 |
| Moser, R. S., Schatz, P., Neidzowski, K., & Ott, S. D. (2011). Group versus individual administration affects baseline neurocognitive test performance. <i>The American Journal of Sports Medicine</i> , 39(11), 2325–2330. <a href="http://doi.org/10.1177/0363546511417114">http://doi.org/10.1177/0363546511417114</a> | NATA       | 65.56%  | 21    | 195 |
| Mueller BA, Cummings P, Rivara FP, Brooks MA, Terasaki RD. Injuries of the head, face, and neck in relation to ski helmet use. <i>Epidemiology</i> . 2008;19(2):270–276.                                                                                                                                                  | NATA       | 59.38%  | 31    | 205 |
| Mueller, B. A., Cummings, P., Rivara, F. P., Brooks, M. A., & Terasaki, R. D. (2008). Injuries of the head, face, and neck in relation to ski helmet use. <i>Epidemiology (Cambridge, Mass.)</i> , 19(2), 270–276. <a href="http://doi.org/10.1097/EDE.0b013e318163567c">http://doi.org/10.1097/EDE.0b013e318163567c</a>  | NATA       | 61.45%  | 32    | 206 |
| O'Donoghue EM, Onate JA, Van Lunen B, Peterson CL. Assessment of high school coaches' knowledge of sport-related concussions. <i>Athl Train Sports Health</i> . 2009;1(3):120–132.                                                                                                                                        | NATA       | 100.00% | 66    | 240 |
| Parker TM, Osternig LR, Van Donkelaar P, Chou LS. Gait stability following concussion. <i>Med Sci Sports Exerc</i> . 2006;38(6):1032–1040.                                                                                                                                                                                | NATA       | 60.00%  | 97    | 271 |
| Patel AV, Mihalik JP, Notebaert AJ, Guskiewicz KM, Prentice WE. Neuropsychological performance, postural stability, and symptoms after dehydration. <i>J Athl Train</i> . 2007;42(1):66–75.                                                                                                                               | NATA       | 100.00% | 91    | 265 |

|                                                                                                                                                                                                                                                                                                                                                                                                           |      |         |     |     |
|-----------------------------------------------------------------------------------------------------------------------------------------------------------------------------------------------------------------------------------------------------------------------------------------------------------------------------------------------------------------------------------------------------------|------|---------|-----|-----|
| Peterson CL, Ferrara MS, Mrazik M, Piland S, Elliot R. Evaluation of neuropsychological domain scores and postural stability following cerebral concussion in sports. <i>Clin J Sport Med</i> . 2003;13(4):230–237.                                                                                                                                                                                       | NATA | 69.23%  | 99  | 273 |
| Piland SG, Motl RW, Ferrara MS, Peterson CL. Evidence for the factorial and construct validity of a self-report concussion symptoms scale. <i>J Athl Train</i> . 2003;38(2):104–112.                                                                                                                                                                                                                      | NATA | 79.93%  | 94  | 268 |
| Pontifex MB, O'Connor PM, Broglio SP, Hillman CH. The association between mild traumatic brain injury history and cognitive control. <i>Neuropsychologia</i> . 2009;47(14):3210–3216.                                                                                                                                                                                                                     | NATA | 75.00%  | 193 | 367 |
| Powell JW, Barber-Foss KD. Traumatic brain injury in high school athletes. <i>JAMA</i> . 1999;282(10):958–963.                                                                                                                                                                                                                                                                                            | NATA | 87.06%  | 151 | 325 |
| Randolph C, Millis S, Barr WB, et al. Concussion symptom inventory: an empirically derived scale for monitoring resolution of symptoms following sport-related concussion. <i>Arch Clin Neuropsychol</i> . 2009;24(3):219–229.                                                                                                                                                                            | NATA | 72.70%  | 95  | 269 |
| Riemann BL, Guskiewicz KM, Shields EW. Relationship between clinical and forceplate measures of postural stability. <i>J Sport Rehabil</i> . 1999;8(2):71–82.                                                                                                                                                                                                                                             | NATA | 100.00% | 104 | 278 |
| Riemann BL, Guskiewicz KM. Effects of mild head injury on postural stability as measured through clinical balance testing. <i>J Athl Train</i> . 2000;35(1):19–25.                                                                                                                                                                                                                                        | NATA | 93.75%  | 103 | 277 |
| Sabin MJ, Van Boxtel BA, Nohren MW, Broglio SP. Presence of headache does not influence sideline neurostatus or balance in high school football athletes. <i>Clin J Sport Med</i> . 2011;21(5):411–                                                                                                                                                                                                       | NATA | 100.00% | 93  | 267 |
| Saunders RL, Harbaugh RE. The second impact in catastrophic contact-sports head trauma. <i>JAMA</i> . 1984;252(4):538–539.                                                                                                                                                                                                                                                                                | NATA | 100.00% | 48  | 222 |
| Schatz P, Pardini JE, Lovell MR, Collins MW, Podell K. Sensitivity and specificity of the ImPACT test battery for concussion in athletes. <i>Arch Clin Neuropsychol</i> . 2006;21(1):91–99.                                                                                                                                                                                                               | NATA | 62.32%  | 113 | 287 |
|                                                                                                                                                                                                                                                                                                                                                                                                           | NATA |         | 87  | 261 |
| Schmidt JD, Register-Mihalik JK, Mihalik JP, Kerr ZY, Guskiewicz KM. Identifying impairments after concussion: normative data versus individualized baselines. <i>Med Sci Sports Exerc</i> . 2012;44(9):1621–1628.                                                                                                                                                                                        | NATA | 67.45%  | 13  | 187 |
| Schulz MR, Marshall SW, Mueller FO, et al. Incidence and risk factors for concussion in high school athletes, North Carolina, 1996–1999. <i>Am J Epidemiol</i> . 2004;160(10):937–944.                                                                                                                                                                                                                    | NATA | 81.55%  | 182 | 356 |
| Sim A, Terrberry-Spohr L, Wilson KR. Prolonged recovery of memory functioning after mild traumatic brain injury in adolescent athletes. <i>J Neurosurg</i> . 2008;108(3):511–516.                                                                                                                                                                                                                         | NATA | 77.09%  | 164 | 338 |
| Sosnoff JJ, Broglio SP, Shin S, Ferrara MS. Previous mild traumatic brain injury and postural control dynamics. <i>J Athl Train</i> . 2011;46(1):85–91.                                                                                                                                                                                                                                                   | NATA | 67.86%  | 196 | 370 |
| Sye G, Sullivan SJ, McCrory P. High school rugby players' understanding of concussion and return to play guidelines. <i>Br J Sports Med</i> . 2006;40(12):1003–1005.                                                                                                                                                                                                                                      | NATA | 100.00% | 59  | 233 |
| Talavage TM, Nauman E, Breedlove EL, et al. Functionally- detected cognitive impairment in high school football players without clinically-diagnosed concussion. <i>J Neurotrauma</i> . <a href="http://online.liebertpub.com/doi/full/10.1089/neu.2010.1512">http://online.liebertpub.com/doi/full/10.1089/neu.2010.1512</a> . Published online ahead of print April 11, 2013. Accessed August 30, 2013. | NATA | 100.00% | 190 | 364 |
| Vagnozzi R, Signoretti S, Cristofori L, et al. Assessment of metabolic brain damage and recovery following mild traumatic brain injury: a multicentre, proton magnetic resonance spectro- scopic study in concussed patients. <i>Brain</i> . 2010;133(11):3232–3242                                                                                                                                       | NATA | 77.14%  | 2   | 176 |

|                                                                                                                                                                                                                                                     |            |               |       |     |
|-----------------------------------------------------------------------------------------------------------------------------------------------------------------------------------------------------------------------------------------------------|------------|---------------|-------|-----|
| Vagnozzi R, Signoretti S, Tavazzi B, et al. Temporal window of metabolic brain vulnerability to concussion: a pilot 1H-magnetic resonance spectroscopy study in concussed athletes, part III. <i>Neurosurgery</i> . 2008;62(6):1286–1295.           | AMSSM/NATA | 64.29%        | 9/123 | 297 |
| Valovich McLeod TC, Barr WB, McCrea M, Guskiewicz KM. Psychometric and measurement properties of concussion assessment tools in youth sports. <i>J Athl Train</i> . 2006;41(4):399–408.                                                             | NATA       | 48.00%        | 175   | 349 |
| Valovich TC, Perrin DH, Gansneder BM. Repeat administration elicits a practice effect with the Balance Error Scoring System but not with the Standardized Assessment of Concussion in high school athletes. <i>J Athl Train</i> . 2003;38(1):51–56. | NATA       | 93.75%        | 106   | 280 |
| Valovich-McLeod TC, Bay RC, Lam KC, Chhabra A. Representative baseline values on the Sport Concussion Assessment Tool 2 (SCAT2) in adolescent athletes vary by gender, grade, and concussion history. <i>Am J Sports Med</i> . 2012;40(4):927–933.  | NATA       | 76.90%        | 41    | 215 |
| Van Kampen DA, Lovell MR, Pardini JE, Collins MW, Fu FH. The “value added” of neurocognitive testing after sports-related concussion. <i>Am J Sports Med</i> . 2006;34(10):1630–1635.                                                               | NATA       | 69.27%        | 115   | 289 |
| Wilkins JC, Valovich McLeod TC, Perrin DH, Gansneder BM. Performance on the Balance Error Scoring System decreases after fatigue. <i>J Athl Train</i> . 2004;39(2):156–161.                                                                         | NATA       | 100.00%       | 110   | 284 |
| Williams SJ, Nukada H. Sport and exercise headache, part 2: diagnosis and classification. <i>Br J Sports Med</i> . 1994;28(2):96–100.                                                                                                               | NATA       | 51.94%        | 92    | 266 |
| Wisniewski JF, Guskiewicz KM, Trope M, Sigurdsson A. Incidence of cerebral concussions associated with type of mouthguard used in college football. <i>Dent Traumatol</i> . 2004;20(3):143–149.                                                     | NATA       | 100.00%       | 135   | 309 |
| Wood RL, McCabe M, Dawkins J. The role of anxiety sensitivity in symptom perception after minor head injury: an exploratory study. <i>Brain Inj</i> . 2011;25(13–14):1296–1299.                                                                     | NATA       | 49.21%        | 68    | 242 |
| Yakovlev PI, Lecours AR. The myelogenetic cycles of regional maturation of the brain. In: Minkowski A, ed. <i>Regional Development of the Brain in Early Life</i> . Philadelphia, PA: FA Davis; 1967:3–70                                           | NATA       | 50.56%        | 15    | 189 |
| Yeates KO, Kaizer E, Rusin J, et al. Reliable change in postconcussive symptoms and its functional consequences among children with mild traumatic brain injury. <i>Arch Pediatr Adolesc Med</i> . 2012;166(7):615–622.                             | NATA       | 68.77%        | 40    | 214 |
| Yeates KO, Luria J, Bartkowski H, Rusin J, Martin L, Bigler ED. Postconcussive symptoms in children with mild closed head injuries. <i>J Head Trauma Rehabil</i> . 1999;14(4):337–350.                                                              | NATA       | 64.36%        | 174   | 348 |
|                                                                                                                                                                                                                                                     |            |               |       |     |
|                                                                                                                                                                                                                                                     |            |               |       |     |
| <b>Total average</b>                                                                                                                                                                                                                                |            | <b>80.09%</b> |       |     |
