# Supplementary material for: Under-representation of female athletes in research informing influential concussion consensus and position statements: an evidence review and synthesis
Source: HighWire-hosted journal article supplement (doi:10.1136/bjsports-2021-105045), 2022-07-18
Supplement: bjsports-2021-105045supp002_data_supplement.pdf [file bjsports-2021-105045supp002_data_supplement.pdf]

## All Papers from All Three Statements (Citation Order)

| Citation                                                                                                                                                                                                                                                                                                                                                                                                                      | Reference Number | Running Total Reference Number | Statement |
|-------------------------------------------------------------------------------------------------------------------------------------------------------------------------------------------------------------------------------------------------------------------------------------------------------------------------------------------------------------------------------------------------------------------------------|------------------|--------------------------------|-----------|
| Harmon KG, Drezner JA, Gammons M, et al. American Medical Society for Sports Medicine position statement: concussion in sport. <i>Br J Sports Med</i> . 2013;47:15–26.                                                                                                                                                                                                                                                        | 1                | 1                              | AMSSM     |
| Ebell MH, Siwek J, Weiss BD, et al. Strength of recommendation taxonomy (SORT): a patient-centered approach to grading evidence in the medical literature. <i>Am Fam Physician</i> . 2004;69:548–556.                                                                                                                                                                                                                         | 2                | 2                              | AMSSM     |
| McCroly P, Meeuwisse W, Dvorak J, et al. Consensus statement on concussion in sport—the 5(th) international conference on concussion in sport held in Berlin. <i>Br J Sports Med</i> 2016;51:838–47.                                                                                                                                                                                                                          | 3                | 3                              | AMSSM     |
| McCroly P, Feddermann-Demont N, Dvorák J, et al. What is the definition of sports-related concussion: a systematic review. <i>Br J Sports Med</i> . 2017;51:877–887.                                                                                                                                                                                                                                                          | 4                | 4                              | AMSSM     |
| Barkhoudarian G, Hovda DA, Giza CC. The molecular pathophysiology of concussive brain injury. <i>Clin Sports Med</i> . 2011;30:33–48, vii–iii.                                                                                                                                                                                                                                                                                | 5                | 5                              | AMSSM     |
| Maugans, T. A., Farley, C., Altaye, M., Leach, J., & Cecil, K. M. (2012). Pediatric sports-related concussion produces cerebral blood flow alterations. <i>Pediatrics</i> , 129(1), 28–37. <a href="http://doi.org/10.1542/peds.2011-2083">http://doi.org/10.1542/peds.2011-2083</a>                                                                                                                                          | 6                | 6                              | AMSSM     |
| Meier, T. B., Bellgowan, P. S. F., Singh, R., Kuplicki, R., Polanski, D. W., & Mayer, A. R. (2015). Recovery of cerebral blood flow following sports-related concussion. <i>JAMA Neurology</i> , 72(5), 530–538. <a href="http://doi.org/10.1001/jamaneurol.2014.4778">http://doi.org/10.1001/jamaneurol.2014.4778</a>                                                                                                        | 7                | 7                              | AMSSM     |
| Vagnozzi, R., Tavazzi, B., Signoretti, S., Amorini, A. M., Belli, A., Cimatti, M., et al. (2007). Temporal window of metabolic brain vulnerability to concussions: mitochondrial-related impairment—part I. <i>Neurosurgery</i> , 61(2), 379–88—discussion 388–9. <a href="http://doi.org/10.1227/01.NEU.0000280002.41696.D8">http://doi.org/10.1227/01.NEU.0000280002.41696.D8</a>                                           | 8                | 8                              | AMSSM     |
| Vagnozzi, R., Signoretti, S., Tavazzi, B., Floris, R., Ludovici, A., Marziali, S., et al. (2008). Temporal window of metabolic brain vulnerability to concussion: a pilot 1H-magnetic resonance spectroscopic study in concussed athletes—part III. <i>Neurosurgery</i> , 62(6), 1286–95—discussion 1295–6. <a href="http://doi.org/10.1227/01.neu.0000333300.34189.74">http://doi.org/10.1227/01.neu.0000333300.34189.74</a> | 9                | 9                              | AMSSM     |
| Longhi, L., Saatman, K. E., Fujimoto, S., Raghupathi, R., Meaney, D. F., Davis, J., ... McIntosh, T. K. (2005). Temporal Window of Vulnerability to Repetitive Experimental Concussive Brain Injury. <i>Neurosurgery</i> , 56(2), 364–374. <a href="https://doi.org/10.1227/01.neu.0000149008.73513.44">doi:10.1227/01.neu.0000149008.73513.44</a>                                                                            | 10               | 10                             | AMSSM     |
| Bryan MA, Rowhani-Rahbar A, Comstock RD, et al; Seattle Sports Concussion Research Collaborative. Sports- and recreation-related concussions in US youth. <i>Pediatrics</i> . 2016;138:e20154635.                                                                                                                                                                                                                             | 11               | 11                             | AMSSM     |

## All Papers from All Three Statements (Citation Order)

|                                                                                                                                                                                                                                                                                                                                                                                                                                                          |    |    |       |
|----------------------------------------------------------------------------------------------------------------------------------------------------------------------------------------------------------------------------------------------------------------------------------------------------------------------------------------------------------------------------------------------------------------------------------------------------------|----|----|-------|
| Kerr, Z. Y., Roos, K. G., Djoko, A., Dalton, S. L., Broglio, S. P., Marshall, S. W., & Dompier, T. P. (2017). Epidemiologic Measures for Quantifying the Incidence of Concussion in National Collegiate Athletic Association Sports. <i>Journal of Athletic Training</i> , 52(3), 167–174. <a href="http://doi.org/10.4085/1062-6050-51.6.05">http://doi.org/10.4085/1062-6050-51.6.05</a>                                                               | 12 | 12 | AMSSM |
| Tsushima, W. T., Siu, A. M., Ahn, H. J., Chang, B. L., & Murata, N. M. (2019). Incidence and Risk of Concussions in Youth Athletes: Comparisons of Age, Sex, Concussion History, Sport, and Football Position. <i>Archives of Clinical Neuropsychology : the Official Journal of the National Academy of Neuropsychologists</i> , 34(1), 60–69. <a href="http://doi.org/10.1093/arclin/acy019">http://doi.org/10.1093/arclin/acy019</a>                  | 13 | 13 | AMSSM |
| Bretzin, A. C., Covassin, T., Fox, M. E., Petit, K. M., Savage, J. L., Walker, L. F., & Gould, D. (2018). Sex Differences in the Clinical Incidence of Concussions, Missed School Days, and Time Loss in High School Student-Athletes: Part 1. <i>The American Journal of Sports Medicine</i> , 46(9), 2263–2269. <a href="http://doi.org/10.1177/0363546518778251">http://doi.org/10.1177/0363546518778251</a>                                          | 14 | 14 | AMSSM |
| Barr, W. B., & McCrea, M. (2001). Sensitivity and specificity of standardized neurocognitive testing immediately following sports concussion. <i>Journal of the International Neuropsychological Society</i> , 7(6), 693–702. <a href="http://doi.org/10.1017/s1355617701766052">http://doi.org/10.1017/s1355617701766052</a>                                                                                                                            | 15 | 15 | AMSSM |
| Barr, W. B., Prichep, L. S., Chabot, R., Powell, M. R., & McCrea, M. (2012). Measuring brain electrical activity to track recovery from sport-related concussion. <i>Brain Injury : [BI]</i> , 26(1), 58–66. <a href="http://doi.org/10.3109/02699052.2011.608216">http://doi.org/10.3109/02699052.2011.608216</a>                                                                                                                                       | 16 | 16 | AMSSM |
| McCrea, M., Kelly, J. P., Randolph, C., Cisler, R., & Berger, L. (2002). Immediate neurocognitive effects of concussion. <i>Neurosurgery</i> , 50(5), 1032–40– discussion 1040–2. <a href="http://doi.org/10.1097/00006123-200205000-00017">http://doi.org/10.1097/00006123-200205000-00017</a>                                                                                                                                                          | 17 | 17 | AMSSM |
| McCrea M. Standardized mental status assessment of sports concussion. <i>Clin J Sport Med</i> . 2001;11:176–181.                                                                                                                                                                                                                                                                                                                                         | 18 | 18 | AMSSM |
| McCrea, M., Barr, W. B., Guskiewicz, K., Randolph, C., Marshall, S. W., Cantu, R., et al. (2005). Standard regression-based methods for measuring recovery after sport-related concussion. <i>Journal of the International Neuropsychological Society</i> , 11(1), 58–69. <a href="http://doi.org/10.1017/S1355617705050083">http://doi.org/10.1017/S1355617705050083</a>                                                                                | 19 | 19 | AMSSM |
| Marinides, Z., Galetta, K. M., Andrews, C. N., Wilson, J. A., Herman, D. C., Robinson, C. D., et al. (2015). Vision testing is additive to the sideline assessment of sports-related concussion. <i>Neurology. Clinical Practice</i> , 5(1), 25–34. <a href="http://doi.org/10.1212/CPJ.0000000000000060">http://doi.org/10.1212/CPJ.0000000000000060</a>                                                                                                | 20 | 20 | AMSSM |
| Galetta, K. M., Morganroth, J., Moehringer, N., Mueller, B., Hasanaj, L., Webb, N., et al. (2015). Adding Vision to Concussion Testing: A Prospective Study of Sideline Testing in Youth and Collegiate Athletes. <i>Journal of Neuro-Ophthalmology : the Official Journal of the North American Neuro-Ophthalmology Society</i> , 35(3), 235–241. <a href="http://doi.org/10.1097/WNO.0000000000000226">http://doi.org/10.1097/WNO.0000000000000226</a> | 21 | 21 | AMSSM |

## All Papers from All Three Statements (Citation Order)

|                                                                                                                                                                                                                                                                                                                                                                                                                                                                                                              |    |    |       |
|--------------------------------------------------------------------------------------------------------------------------------------------------------------------------------------------------------------------------------------------------------------------------------------------------------------------------------------------------------------------------------------------------------------------------------------------------------------------------------------------------------------|----|----|-------|
| Putukian, M., Echemendia, R., Dettwiler-Danspeckgruber, A., Duliba, T., Bruce, J., Furtado, J. L., & Murugavel, M. (2015). Prospective clinical assessment using Sideline Concussion Assessment Tool-2 testing in the evaluation of sport-related concussion in college athletes. <i>Clinical Journal of Sport Medicine : Official Journal of the Canadian Academy of Sport Medicine</i> , 25(1), 36–42. <a href="http://doi.org/10.1097/JSM.000000000000102">http://doi.org/10.1097/JSM.000000000000102</a> | 22 | 22 | AMSSM |
| Chin, E. Y., Nelson, L. D., Barr, W. B., McCrory, P., & McCrea, M. A. (2016). Reliability and Validity of the Sport Concussion Assessment Tool-3 (SCAT3) in High School and Collegiate Athletes. <i>The American Journal of Sports Medicine</i> , 44(9), 2276–2285. <a href="http://doi.org/10.1177/0363546516648141">http://doi.org/10.1177/0363546516648141</a>                                                                                                                                            | 23 | 23 | AMSSM |
| Seidman, D. H., Burlingame, J., Yousif, L. R., Donahue, X. P., Krier, J., Rayes, L. J., et al. (2015). Evaluation of the King-Devick test as a concussion screening tool in high school football players. <i>Journal of the Neurological Sciences</i> , 356(1-2), 97–101. <a href="http://doi.org/10.1016/j.jns.2015.06.021">http://doi.org/10.1016/j.jns.2015.06.021</a>                                                                                                                                    | 24 | 24 | AMSSM |
| Dompier, T. P., Kerr, Z. Y., Marshall, S. W., Hainline, B., Snook, E. M., Hayden, R., & Simon, J. E. (2015). Incidence of Concussion During Practice and Games in Youth, High School, and Collegiate American Football Players. <i>JAMA Pediatrics</i> , 169(7), 659–665. <a href="http://doi.org/10.1001/jamapediatrics.2015.0210">http://doi.org/10.1001/jamapediatrics.2015.0210</a>                                                                                                                      | 25 | 25 | AMSSM |
| Houck, Z., Asken, B., Bauer, R., Pothast, J., Michaudet, C., & Clugston, J. (2016). Epidemiology of Sport-Related Concussion in an NCAA Division I Football Bowl Subdivision Sample. <i>The American Journal of Sports Medicine</i> , 44(9), 2269–2275. <a href="http://doi.org/10.1177/0363546516645070">http://doi.org/10.1177/0363546516645070</a>                                                                                                                                                        | 26 | 26 | AMSSM |
| Galetta, K. M., Brandes, L. E., Maki, K., Dziemianowicz, M. S., Laudano, E., Allen, M., et al. (2011). The King-Devick test and sports-related concussion: study of a rapid visual screening tool in a collegiate cohort. <i>Journal of the Neurological Sciences</i> , 309(1-2), 34–39. <a href="http://doi.org/10.1016/j.jns.2011.07.039">http://doi.org/10.1016/j.jns.2011.07.039</a>                                                                                                                     | 27 | 27 | AMSSM |
| Leong DF, Balcer LJ, Galetta SL, et al. The King-Devick test for sideline concussion screening in collegiate football. <i>J Optom</i> . 2015;8:131–139.                                                                                                                                                                                                                                                                                                                                                      | 28 | 28 | AMSSM |
| Dhawan, P. S., Leong, D., Tapsell, L., Starling, A. J., Galetta, S. L., Balcer, L. J., et al. (2017). King-Devick Test identifies real-time concussion and asymptomatic concussion in youth athletes. <i>Neurology. Clinical Practice</i> , 7(6), 464–473. <a href="http://doi.org/10.1212/CPJ.0000000000000381">http://doi.org/10.1212/CPJ.0000000000000381</a>                                                                                                                                             | 29 | 29 | AMSSM |
| Bernhardt D, Roberts W, eds. <i>Preparticipation Physical Evaluation Monograph</i> . 4th ed. Chicago, IL: American Academy of Pediatrics; 2010.                                                                                                                                                                                                                                                                                                                                                              | 30 | 30 | AMSSM |
| National Collegiate Athletic Association (NCAA). <i>Interassociation Consensus: Diagnosis and Management of Sport-Related Concussion Best Practices</i> . Indianapolis, IN; 2016.                                                                                                                                                                                                                                                                                                                            | 31 | 31 | AMSSM |
| Herring SA, Cantu RC, Guskiewicz KM, et al. Concussion (mild traumatic brain injury) and the team physician: a consensus statement— 2011 update. <i>Med Sci Sports Exerc</i> . 2011;43:2412–2422.                                                                                                                                                                                                                                                                                                            | 32 | 32 | AMSSM |

## All Papers from All Three Statements (Citation Order)

|                                                                                                                                                                                                                                                                                                                                                                                                                  |    |    |       |
|------------------------------------------------------------------------------------------------------------------------------------------------------------------------------------------------------------------------------------------------------------------------------------------------------------------------------------------------------------------------------------------------------------------|----|----|-------|
| Broglio, S. P., Katz, B. P., Zhao, S., McCrea, M., McAllister, T., CARE Consortium Investigators. (2018). Test-Retest Reliability and Interpretation of Common Concussion Assessment Tools: Findings from the NCAA-DoD CARE Consortium. <i>Sports Medicine</i> , 48(5), 1255–1268. <a href="http://doi.org/10.1007/s40279-017-0813-0">http://doi.org/10.1007/s40279-017-0813-0</a>                               | 33 | 33 | AMSSM |
| Nelson LD, LaRoche AA, Pfaller AY, et al. Prospective, head-to-head study of three computerized neurocognitive assessment tools (CNTs): reliability and validity for the assessment of sport-related concussion. <i>J Int Neuropsychol Soc</i> . 2016;22:24–37.                                                                                                                                                  | 34 | 34 | AMSSM |
| Tucker, R., Raftery, M., Fuller, G. W., Hester, B., Kemp, S., & Cross, M. J. (2017). A video analysis of head injuries satisfying the criteria for a head injury assessment in professional Rugby Union: a prospective cohort study. <i>British Journal of Sports Medicine</i> , 51(15), 1147–1151. <a href="http://doi.org/10.1136/bjsports-2017-097883">http://doi.org/10.1136/bjsports-2017-097883</a>        | 35 | 35 | AMSSM |
| Fuller, G. W., Kemp, S. P. T., & Raftery, M. (2017). The accuracy and reproducibility of video assessment in the pitch-side management of concussion in elite rugby. <i>Journal of Science and Medicine in Sport / Sports Medicine Australia</i> , 20(3), 246–249. <a href="http://doi.org/10.1016/j.jsams.2016.07.008">http://doi.org/10.1016/j.jsams.2016.07.008</a>                                           | 36 | 36 | AMSSM |
| Echemendia, R. J., Bruce, J. M., Meeuwisse, W., Hutchison, M. G., Comper, P., & Aubry, M. (2018). Can visible signs predict concussion diagnosis in the National Hockey League? <i>British Journal of Sports Medicine</i> , 52(17), 1149–1154. <a href="http://doi.org/10.1136/bjsports-2016-097090">http://doi.org/10.1136/bjsports-2016-097090</a>                                                             | 37 | 37 | AMSSM |
| Patricios, J., Fuller, G. W., Ellenbogen, R., Herring, S., Kutcher, J. S., Loosemore, M., et al. (2017). What are the critical elements of sideline screening that can be used to establish the diagnosis of concussion? A systematic review. <i>British Journal of Sports Medicine</i> , 51(11), 888–894. <a href="http://doi.org/10.1136/bjsports-2016-097441">http://doi.org/10.1136/bjsports-2016-097441</a> | 38 | 38 | AMSSM |
| Randolph, C., McCrea, M., & Barr, W. B. (2005). Is neuropsychological testing useful in the management of sport-related concussion? <i>Journal of Athletic Training</i> , 40(3), 139–152.                                                                                                                                                                                                                        | 39 | 39 | AMSSM |
| Garcia, G.-G. P., Broglio, S. P., Lavieri, M. S., McCrea, M., McAllister, T., CARE Consortium Investigators. (2018). Quantifying the Value of Multidimensional Assessment Models for Acute Concussion: An Analysis of Data from the NCAA-DoD Care Consortium. <i>Sports Medicine</i> , 48(7), 1739–1749. <a href="http://doi.org/10.1007/s40279-018-0880-x">http://doi.org/10.1007/s40279-018-0880-x</a>         | 40 | 40 | AMSSM |
| Echemendia RJ, Meeuwisse W, McCrory P, et al. The Sport Concussion Assessment Tool 5th Edition (SCAT5): background and rationale. <i>Br J Sports Med</i> . 2017;51:848–850.                                                                                                                                                                                                                                      | 41 | 41 | AMSSM |
| Davis GA, Purcell L, Schneider KJ, et al. The Child Sport Concussion Assessment Tool 5th Edition (Child SCAT5): Background and rationale. <i>Br J Sports Med</i> 2017;51:859–61                                                                                                                                                                                                                                  | 42 | 42 | AMSSM |

## All Papers from All Three Statements (Citation Order)

|                                                                                                                                                                                                                                                                                                                                                                   |    |    |       |
|-------------------------------------------------------------------------------------------------------------------------------------------------------------------------------------------------------------------------------------------------------------------------------------------------------------------------------------------------------------------|----|----|-------|
| Norheim, N., Kissinger-Knox, A., Cheatham, M., & Webbe, F. (2018). Performance of college athletes on the 10-item word list of SCAT5. <i>BMJ Open Sport &amp; Exercise Medicine</i> , 4(1), e000412. <a href="http://doi.org/10.1136/bmjsem-2018-000412">http://doi.org/10.1136/bmjsem-2018-000412</a>                                                            | 43 | 43 | AMSSM |
| Kamins J, Bigler E, Covassin T, et al. What is the physiological time to recovery after concussion? A systematic review. <i>Br J Sports Med</i> 2017;51:935–40.                                                                                                                                                                                                   | 44 | 44 | AMSSM |
| Valovich McLeod, T. C., & Hale, T. D. (2015). Vestibular and balance issues following sport-related concussion. <i>Brain Injury : [BI]</i> , 29(2), 175–184. <a href="http://doi.org/10.3109/02699052.2014.965206">http://doi.org/10.3109/02699052.2014.965206</a>                                                                                                | 45 | 45 | AMSSM |
| Mucha, A., Collins, M. W., Elbin, R. J., Furman, J. M., Troutman-Enseki, C., DeWolf, R. M., et al. (2014). A Brief Vestibular/Ocular Motor Screening (VOMS) Assessment to Evaluate Concussions. <i>The American Journal of Sports Medicine</i> , 42(10), 2479–2486. <a href="http://doi.org/10.1177/0363546514543775">http://doi.org/10.1177/0363546514543775</a> | 46 | 46 | AMSSM |
| Eckner, J. T., Kutcher, J. S., Broglio, S. P., & Richardson, J. K. (2013). Effect of sport-related concussion on clinically measured simple reaction time. <i>British Journal of Sports Medicine</i> , 48(2), 112–118. <a href="http://doi.org/10.1136/bjsports-2012-091579">http://doi.org/10.1136/bjsports-2012-091579</a>                                      | 47 | 47 | AMSSM |
| O'Connor KL, Rowson S, Duma SM, Broglio SP. Head-Impact–Measurement Devices: A Systematic Review. <i>J Athl Train</i> . 2017;52(3):206–227. doi:10.4085/1062-6050.52.2.05.                                                                                                                                                                                        | 48 | 48 | AMSSM |
| Broglio SP, Lapointe A, O'Connor KL, et al. Head impact density: a model to explain the elusive concussion threshold. <i>J Neurotrauma</i> . 2017;34:2675–2683.                                                                                                                                                                                                   | 49 | 49 | AMSSM |
| McCrea M, Meier T, Huber D, et al. Role of advanced neuroimaging, fluid biomarkers and genetic testing in the assessment of sport-related concussion: a systematic review. <i>Br J Sports Med</i> . 2017;51:919–929.                                                                                                                                              | 50 | 50 | AMSSM |
| Collins MW, Kontos AP, Okonkwo DO, et al. Statements of agreement from the Targeted Evaluation and Active Management (TEAM) approaches to treating concussion meeting held in Pittsburgh, October 15–16, 2015. <i>Neurosurgery</i> . 2016;79:912–929.                                                                                                             | 51 | 51 | AMSSM |
| Ellis MJ, Leddy JJ, Willer B. Physiological, vestibulo-ocular and cervicogenic post-concussion disorders: an evidence-based classification system with directions for treatment. <i>Brain Inj</i> . 2015;29:238–248.                                                                                                                                              | 52 | 52 | AMSSM |
| Collins MW, Kontos AP, Reynolds E, et al. A comprehensive, targeted approach to the clinical care of athletes following sport-related concussion. <i>Knee Surg Sports Traumatol Arthrosc</i> . 2014;22:235–246                                                                                                                                                    | 53 | 53 | AMSSM |
| Feddermann-Demont N, Echemendia RJ, Schneider KJ, et al. What domains of clinical function should be assessed after sport-related concussion? A systematic review. <i>Br J Sports Med</i> . 2017;51:903–918.                                                                                                                                                      | 54 | 54 | AMSSM |

## All Papers from All Three Statements (Citation Order)

|                                                                                                                                                                                                                                                                                                                                                                                                                                                         |    |    |       |
|---------------------------------------------------------------------------------------------------------------------------------------------------------------------------------------------------------------------------------------------------------------------------------------------------------------------------------------------------------------------------------------------------------------------------------------------------------|----|----|-------|
| McCrea M, Guskiewicz K, Randolph C, et al. Incidence, clinical course, and predictors of prolonged recovery time following sport-related concussion in high school and college athletes. <i>J Int Neuropsychol Soc.</i> 2013;19:22–33.                                                                                                                                                                                                                  | 55 | 55 | AMSSM |
| Zemek, R., Barrowman, N., Freedman, S. B., Gravel, J., Gagnon, I., McGahern, C., et al. (2016). Clinical Risk Score for Persistent Postconcussion Symptoms Among Children With Acute Concussion in the ED. <i>JAMA: the Journal of the American Medical Association</i> , 315(10), 1014–12. <a href="http://doi.org/10.1001/jama.2016.1203">http://doi.org/10.1001/jama.2016.1203</a>                                                                   | 56 | 56 | AMSSM |
| McCrea, M., Guskiewicz, K., Randolph, C., Barr, W. B., Hammeke, T. A., Marshall, S. W., ... & Kelly, J. P. (2013). Incidence, clinical course, and predictors of prolonged recovery time following sport-related concussion in high school and college athletes. <i>Journal of the International Neuropsychological Society: JINS</i> , 19(1), 22.                                                                                                      | 57 | 57 | AMSSM |
| Leddy, J. J., Hinds, A. L., Miecznikowski, J., Darling, S., Matuszak, J., Baker, J. G., et al. (2018). Safety and Prognostic Utility of Provocative Exercise Testing in Acutely Concussed Adolescents: A Randomized Trial. <i>Clinical Journal of Sport Medicine : Official Journal of the Canadian Academy of Sport Medicine</i> , 28(1), 13–20. <a href="http://doi.org/10.1097/JSM.0000000000000431">http://doi.org/10.1097/JSM.0000000000000431</a> | 58 | 58 | AMSSM |
| Schneider KJ, Leddy JJ, Guskiewicz KM, et al. Rest and treatment/ rehabilitation following sport-related concussion: a systematic review. <i>Br J Sports Med.</i> 2017;51:930–934.                                                                                                                                                                                                                                                                      | 59 | 59 | AMSSM |
| Schneider KJ, Iverson GL, Emery CA, et al. The effects of rest and treatment following sport-related concussion: a systematic review of the literature. <i>Br J Sports Med.</i> 2013;47:304–307.                                                                                                                                                                                                                                                        | 60 | 60 | AMSSM |
| Griesbach GS, Hovda DA, Molteni R, Wu A, Gomez-Pinilla F. Voluntary exercise following traumatic brain injury: brain-derived neurotrophic factor upregulation and recovery of function. <i>Neuroscience.</i> 2004;125(1):129-139. <a href="https://doi.org/10.1016/j.neuroscience.2004.01.030">doi:10.1016/j.neuroscience.2004.01.030</a> .                                                                                                             | 61 | 61 | AMSSM |
| Griesbach GS, Tio DL, Vincelli J, et al. Differential effects of voluntary and forced exercise on stress responses after traumatic brain injury. <i>J Neurotrauma.</i> 2012;29:1426–1433.                                                                                                                                                                                                                                                               | 62 | 62 | AMSSM |
| Griesbach GS, Tio DL, Nair S, et al. Recovery of stress response coincides with responsiveness to voluntary exercise after traumatic brain injury. <i>J Neurotrauma.</i> 2014;31:674–682.                                                                                                                                                                                                                                                               | 63 | 63 | AMSSM |
| Mychasiuk R, Hehar H, Ma I, et al. Reducing the time interval between concussion and voluntary exercise restores motor impairment, short- term memory, and alterations to gene expression. <i>Eur J Neurosci.</i> 2016; 44:2407–2417.                                                                                                                                                                                                                   | 64 | 64 | AMSSM |
| Thomas DG, Apps JN, Hoffmann RG, McCrea M, Hammeke T. Benefits of strict rest after acute concussion: a randomized controlled trial. <i>Pediatrics.</i> 2015;135(2):213-223. <a href="https://doi.org/10.1542/peds.2014-0966">doi:10.1542/peds.2014-0966</a> .                                                                                                                                                                                          | 65 | 65 | AMSSM |

## All Papers from All Three Statements (Citation Order)

|                                                                                                                                                                                                                                                                      |    |    |       |
|----------------------------------------------------------------------------------------------------------------------------------------------------------------------------------------------------------------------------------------------------------------------|----|----|-------|
| Grool AM, Aglipay M, Momoli F, et al. Association Between Early Participation in Physical Activity Following Acute Concussion and Persistent Postconcussive Symptoms in Children and Adolescents. <i>JAMA</i> . 2016;316(23):2504-2514. doi:10.1001/jama.2016.17396. | 66 | 66 | AMSSM |
| 1. Leddy JJ, Kozlowski K, Fung M, Pendergast DR, Willer B. Regulatory and autoregulatory physiological dysfunction as a primary characteristic of post concussion syndrome: implications for treatment. <i>NeuroRehabilitation</i> . 2007;22(3):199-205.             | 67 | 67 | AMSSM |
| Clausen M, Pendergast DR, Willer B, et al. Cerebral blood flow during treadmill exercise is a marker of physiological postconcussion syndrome in female athletes. <i>J Head Trauma Rehabil</i> . 2016;31:215–224                                                     | 68 | 68 | AMSSM |
| 1. Besnier F, Labrunée M, Pathak A, et al. Exercise training-induced modification in autonomic nervous system: An update for cardiac patients. <i>Ann Phys Rehabil Med</i> . 2017;60(1):27-35. doi:10.1016/j.rehab.2016.07.002.                                      | 69 | 69 | AMSSM |
| 1. Erickson KI, Voss MW, Prakash RS, et al. Exercise training increases size of hippocampus and improves memory. <i>Proc Natl Acad Sci USA</i> . 2011;108(7):3017-3022. doi:10.1073/pnas.1015950108.                                                                 | 70 | 70 | AMSSM |
| 1. Lawrence DW, Richards D, Comper P, Hutchison MG. Earlier time to aerobic exercise is associated with faster recovery following acute sport concussion. Janigro D, ed. <i>PLoS ONE</i> . 2018;13(4):e0196062–12. doi:10.1371/journal.pone.0196062.                 | 71 | 71 | AMSSM |
| Leddy JJ, Haider MN, Hinds AL, Darling S, Willer BS. A Preliminary Study of the Effect of Early Aerobic Exercise Treatment for Sport-Related Concussion in Males. <i>Clin J Sport Med</i> . 2019;29(5):353-360. doi:10.1097/JSM.0000000000000663.                    | 72 | 72 | AMSSM |
| Oliver JM, Anzalone AJ, Turner SM. Protection Before Impact: the Potential Neuroprotective Role of Nutritional Supplementation in Sports-Related Head Trauma. <i>Sports Medicine</i> . 2018;48(Suppl 1):39-52. doi:10.1007/s40279-017-0847-3.                        | 73 | 73 | AMSSM |
| Trojan TH, Wang DH, Leddy JJ. Nutritional supplements for the treatment and prevention of sports-related concussion-evidence still lacking. <i>Curr Sports Med Rep</i> . 2017;16:247–255.                                                                            | 74 | 74 | AMSSM |
| Ashbaugh, A., & McGrew, C. (2016). The Role of Nutritional Supplements in Sports Concussion Treatment. <i>Current Sports Medicine Reports</i> , 15(1), 16–19. <a href="http://doi.org/10.1249/JSR.0000000000000219">http://doi.org/10.1249/JSR.0000000000000219</a>  | 75 | 75 | AMSSM |
| Oliver JM, Jones MT, Kirk KM, et al. Effect of docosahexaenoic acid on a biomarker of head trauma in American football. <i>Med Sci Sports Exerc</i> . 2016;48:974–982.                                                                                               | 76 | 76 | AMSSM |
| Makdissi M, Schneider KJ, Feddermann-Demont N, et al. Approach to investigation and treatment of persistent symptoms following sport-related concussion: a systematic review. <i>Br J Sports Med</i> . 2017;51:958–968.                                              | 77 | 77 | AMSSM |



## All Papers from All Three Statements (Citation Order)

|                                                                                                                                                                                                                                                                                                                                                                                                  |    |    |       |
|--------------------------------------------------------------------------------------------------------------------------------------------------------------------------------------------------------------------------------------------------------------------------------------------------------------------------------------------------------------------------------------------------|----|----|-------|
| Leddy JJ, Baker JG, Kozlowski K, et al. Reliability of a graded exercise test for assessing recovery from concussion. <i>Clin J Sport Med.</i> 2011;21:89–94.                                                                                                                                                                                                                                    | 78 | 78 | AMSSM |
| Leddy JJ, Kozlowski K, Donnelly JP, et al. A preliminary study of subsymptom threshold exercise training for refractory post-concussion syndrome. <i>Clin J Sport Med.</i> 2010;20:21–27.                                                                                                                                                                                                        | 79 | 79 | AMSSM |
| Ellis, M. J., Leddy, J., & Willer, B. (2016). Multi-Disciplinary Management of Athletes with Post-Concussion Syndrome: An Evolving Pathophysiological Approach. <i>Frontiers in Neurology</i> , 7, 136. <a href="http://doi.org/10.3389/fneur.2016.00136">http://doi.org/10.3389/fneur.2016.00136</a>                                                                                            | 80 | 80 | AMSSM |
| Leddy, J. J., Haider, M. N., Ellis, M., & Willer, B. S. (2018). Exercise is Medicine for Concussion. <i>Current Sports Medicine Reports</i> , 17(8), 262–270. <a href="http://doi.org/10.1249/JSR.0000000000000505">http://doi.org/10.1249/JSR.0000000000000505</a>                                                                                                                              | 81 | 81 | AMSSM |
| Broglio, S. P., Collins, M. W., Williams, R. M., Mucha, A., & Kontos, A. P. (2015). Current and emerging rehabilitation for concussion: a review of the evidence. <i>Clinics in Sports Medicine</i> , 34(2), 213–231. <a href="http://doi.org/10.1016/j.csm.2014.12.005">http://doi.org/10.1016/j.csm.2014.12.005</a>                                                                            | 82 | 82 | AMSSM |
| Schneider KJ, Meeuwisse WH, Nettel-Aguirre A, et al. Cervicovestibular rehabilitation in sport-related concussion: a randomised controlled trial. <i>Br J Sports Med</i> 2014;48:1294–8.                                                                                                                                                                                                         | 83 | 83 | AMSSM |
| Hugentobler JA, Vegh M, Janiszewski B, et al. Physical therapy intervention strategies for patients with prolonged mild traumatic brain injury symptoms: A case series. <i>Int J Sports Phys Ther</i> 2015;10:676–89                                                                                                                                                                             | 84 | 84 | AMSSM |
| Hoffman, N. L., Weber, M. L., Broglio, S. P., McCreary, M., McAllister, T. W., & Schmidt, J. D. (2017). Influence of Postconcussion Sleep Duration on Concussion Recovery in Collegiate Athletes. <i>Clinical Journal of Sport Medicine</i> , Publish Ahead of Print, 1–7. <a href="http://doi.org/10.1097/JSM.0000000000000538">http://doi.org/10.1097/JSM.0000000000000538</a>                 | 85 | 85 | AMSSM |
| McCarty CA, Zatzick D, Stein E, et al. Collaborative care for adolescents with persistent postconcussive symptoms: a randomized trial. <i>Pediatrics</i> 2016;138:e20160459.                                                                                                                                                                                                                     | 86 | 86 | AMSSM |
| O'Neill, J. A., Cox, M. K., Clay, O. J., Johnston, J. M., Jr., Novack, T. A., Schwebel, D. C., & Dreer, L. E. (2017). A review of the literature on pediatric concussions and return-to-learn (RTL): Implications for RTL policy, research, and practice. <i>Rehabilitation Psychology</i> , 62(3), 300–323. <a href="https://doi.org/10.1037/rep0000155">https://doi.org/10.1037/rep0000155</a> | 87 | 87 | AMSSM |
| Halstead, M. E., McAvoy, K., Devore, C. D., Carl, R., Lee, M., Logan, K., et al. (2013). Returning to learning following a concussion. <i>Pediatrics</i> , 132(5), 948–957. <a href="http://doi.org/10.1542/peds.2013-2867">http://doi.org/10.1542/peds.2013-2867</a>                                                                                                                            | 88 | 88 | AMSSM |
| McAvoy, K., Eagan-Johnson, B., & Halstead, M. (2018). Return to learn: Transitioning to school and through ascending levels of academic support for students following a concussion. <i>NeuroRehabilitation</i> , 42(3), 325–330. <a href="http://doi.org/10.3233/NRE-172381">http://doi.org/10.3233/NRE-172381</a>                                                                              | 89 | 89 | AMSSM |



## All Papers from All Three Statements (Citation Order)

|                                                                                                                                                                                                                                                                                                                                                                                                                                                            |    |    |       |
|------------------------------------------------------------------------------------------------------------------------------------------------------------------------------------------------------------------------------------------------------------------------------------------------------------------------------------------------------------------------------------------------------------------------------------------------------------|----|----|-------|
| Lucas, J. A., Moore, J. B., Davis, S., Brooks, J. O., & Miles, C. (2019). Provider attitudes and management regarding returning to drive after concussion. <i>British Journal of Sports Medicine</i> , 53(8), 495. <a href="http://doi.org/10.1136/bjsports-2018-099118">http://doi.org/10.1136/bjsports-2018-099118</a>                                                                                                                                   | 90 | 90 | AMSSM |
| Schmidt, J. D., Hoffman, N. L., Ranchet, M., Miller, L. S., Tomporowski, P. D., Akinwuntan, A. E., & Devos, H. (2017). Driving after Concussion: Is It Safe To Drive after Symptoms Resolve? <i>Journal of Neurotrauma</i> , 34(8), 1571–1578. <a href="http://doi.org/10.1089/neu.2016.4668">http://doi.org/10.1089/neu.2016.4668</a>                                                                                                                     | 91 | 91 | AMSSM |
| Asken, B. M., Bauer, R. M., Guskiewicz, K. M., McCrea, M. A., Schmidt, J. D., Giza, C. C., et al. (2018). Immediate Removal From Activity After Sport-Related Concussion Is Associated With Shorter Clinical Recovery and Less Severe Symptoms in Collegiate Student-Athletes. <i>The American Journal of Sports Medicine</i> , 46(6), 363546518757984–1474. <a href="http://doi.org/10.1177/0363546518757984">http://doi.org/10.1177/0363546518757984</a> | 92 | 92 | AMSSM |
| Asken, B. M., McCrea, M. A., Clugston, J. R., Snyder, A. R., Houck, Z. M., & Bauer, R. M. (2016). "Playing Through It": Delayed Reporting and Removal From Athletic Activity After Concussion Predicts Prolonged Recovery. <i>Journal of Athletic Training</i> , 51(4), 329–335. <a href="http://doi.org/10.4085/1062-6050-51.5.02">http://doi.org/10.4085/1062-6050-51.5.02</a>                                                                           | 93 | 93 | AMSSM |
| Elbin, R. J., Sufrinko, A., Schatz, P., French, J., Henry, L., Burkhart, S., et al. (2016). Removal From Play After Concussion and Recovery Time. <i>Pediatrics</i> , 138(3). <a href="http://doi.org/10.1542/peds.2016-0910">http://doi.org/10.1542/peds.2016-0910</a>                                                                                                                                                                                    | 94 | 94 | AMSSM |
| Howell, D. R., O'Brien, M. J., Fraser, J., & Meehan, W. P. (2018). Continuing Play, Symptom Severity, and Symptom Duration After Concussion in Youth Athletes. <i>Clinical Journal of Sport Medicine</i> , Publish Ahead of Print, 1–5. <a href="http://doi.org/10.1097/JSM.0000000000000570">http://doi.org/10.1097/JSM.0000000000000570</a>                                                                                                              | 95 | 95 | AMSSM |
| McCrea, M., Guskiewicz, K., Randolph, C., Barr, W. B., Hammeke, T. A., Marshall, S. W., & Kelly, J. P. (2009). Effects of a symptom-free waiting period on clinical outcome and risk of reinjury after sport-related concussion. <i>Neurosurgery</i> , 65(5), 876–82– discussion 882–3. <a href="http://doi.org/10.1227/01.NEU.0000350155.89800.00">http://doi.org/10.1227/01.NEU.0000350155.89800.00</a>                                                  | 96 | 96 | AMSSM |
| Brooks, M. A., Peterson, K., Biese, K., Sanfilippo, J., Heiderscheit, B. C., & Bell, D. R. (2016). Concussion Increases Odds of Sustaining a Lower Extremity Musculoskeletal Injury After Return to Play Among Collegiate Athletes. <i>The American Journal of Sports Medicine</i> , 44(3), 742–747. <a href="http://doi.org/10.1177/0363546515622387">http://doi.org/10.1177/0363546515622387</a>                                                         | 97 | 97 | AMSSM |
| Herman, D. C., Jones, D., Harrison, A., Moser, M., Tillman, S., Farmer, K., et al. (2017). Concussion May Increase the Risk of Subsequent Lower Extremity Musculoskeletal Injury in Collegiate Athletes. <i>Sports Medicine</i> , 47(5), 1003–1010. <a href="http://doi.org/10.1007/s40279-016-0607-9">http://doi.org/10.1007/s40279-016-0607-9</a>                                                                                                        | 98 | 98 | AMSSM |
| Stovitz, S. D., Weseman, J. D., Hooks, M. C., Schmidt, R. J., Koffel, J. B., & Patricios, J. S. (2017). What Definition Is Used to Describe Second Impact                                                                                                                                                                                                                                                                                                  | 99 | 99 | AMSSM |

## All Papers from All Three Statements (Citation Order)

|                                                                                                                                                                                                                                                                                                                                                        |     |     |       |
|--------------------------------------------------------------------------------------------------------------------------------------------------------------------------------------------------------------------------------------------------------------------------------------------------------------------------------------------------------|-----|-----|-------|
| Syndrome in Sports? A Systematic and Critical Review. <i>Current Sports Medicine Reports</i> , 16(1), 50–55. <a href="http://doi.org/10.1249/JSR.0000000000000326">http://doi.org/10.1249/JSR.0000000000000326</a>                                                                                                                                     |     |     |       |
| Cooney, G., Dwan, K., & Mead, G. (2014). Exercise for depression. <i>JAMA : the Journal of the American Medical Association</i> , 311(23), 2432–2433. <a href="http://doi.org/10.1001/jama.2014.4930">http://doi.org/10.1001/jama.2014.4930</a>                                                                                                        | 100 | 100 | AMSSM |
| Kerr, Z. Y., Evenson, K. R., Rosamond, W. D., Mihalik, J. P., Guskiewicz, K. M., & Marshall, S. W. (2014). Association between concussion and mental health in former collegiate athletes. <i>Injury Epidemiology</i> , 1(1), 28. <a href="http://doi.org/10.1186/s40621-014-0028-x">http://doi.org/10.1186/s40621-014-0028-x</a>                      | 101 | 101 | AMSSM |
| Guskiewicz KM, Marshall SW, Bailes J, et al. Recurrent concussion and risk of depression in retired professional football players. <i>Med Sci Sports Exerc.</i> 2007;39:903–909.                                                                                                                                                                       | 102 | 102 | AMSSM |
| Lehman EJ, Hein MJ, Gersic CM. Suicide mortality among retired National Football League players who played 5 or more seasons. <i>Am J Sports Med.</i> 2016;44:2486–2491.                                                                                                                                                                               | 103 | 103 | AMSSM |
| Deshpande, S. K., Hasegawa, R. B., Rabinowitz, A. R., Whyte, J., Roan, C. L., Tabatabaei, A., et al. (2017). Association of Playing High School Football With Cognition and Mental Health Later in Life. <i>JAMA Neurology</i> , 74(8), 909–918. <a href="http://doi.org/10.1001/jamaneurol.2017.1317">http://doi.org/10.1001/jamaneurol.2017.1317</a> | 104 | 104 | AMSSM |
| Iverson GL, Keene CD, Perry G, Castellani RJ. The Need to Separate Chronic Traumatic Encephalopathy Neuropathology from Clinical Features. <i>J Alzheimers Dis.</i> 2018;61(1):17-28. doi:10.3233/JAD-170654.                                                                                                                                          | 105 | 105 | AMSSM |
| McKee AC, Stein TD, Nowinski CJ, et al. The spectrum of disease in chronic traumatic encephalopathy. <i>Brain.</i> 2013;136:43–64.                                                                                                                                                                                                                     | 106 | 106 | AMSSM |
| Stein TD, Alvarez VE, McKee AC. Chronic traumatic encephalopathy: a spectrum of neuropathological changes following repetitive brain trauma in athletes and military personnel. <i>Alzheimers Res Ther.</i> 2014;6(1):4-11. doi:10.1186/alzrt234.                                                                                                      | 107 | 107 | AMSSM |
| Savica R, Parisi JE, Wold LE, et al. High school football and risk of neurodegeneration: a community-based study. <i>Mayo Clin Proc.</i> 2012; 87:335–340.                                                                                                                                                                                             | 108 | 108 | AMSSM |
| Janssen PH, Mandrekar J, Mielke MM, et al. High school football and late-life risk of neurodegenerative syndromes, 1956–1970. <i>Mayo Clin Proc.</i> 2017;92:66–71.                                                                                                                                                                                    | 109 | 109 | AMSSM |
| Asken BM, Sullan MJ, DeKosky ST, Jaffee MS, Bauer RM. Research Gaps and Controversies in Chronic Traumatic Encephalopathy: A Review. <i>JAMA Neurol.</i> 2017;74(10):1255-1262. doi:10.1001/jamaneurol.2017.2396.                                                                                                                                      | 110 | 110 | AMSSM |
| Asken BM, Sullan MJ, Snyder AR, et al. Factors Influencing Clinical Correlates of Chronic Traumatic Encephalopathy (CTE): a Review. <i>Neuropsychol Rev.</i> 2016;26(4):340-363. doi:10.1007/s11065-016-9327-z.                                                                                                                                        | 111 | 111 | AMSSM |
| Manley G, Gardner AJ, Schneider KJ, et al. A systematic review of potential long-term effects of sport-related concussion. <i>Br J Sports Med.</i> 2017;51:969–977.                                                                                                                                                                                    | 112 | 112 | AMSSM |

## All Papers from All Three Statements (Citation Order)

|                                                                                                                                                                                                                                                                                                                               |     |     |       |
|-------------------------------------------------------------------------------------------------------------------------------------------------------------------------------------------------------------------------------------------------------------------------------------------------------------------------------|-----|-----|-------|
| Mainwaring L, Ferdinand Pennock KM, Mylabathula S, Alavie BZ. Subconcussive head impacts in sport: A systematic review of the evidence. <i>International journal of psychophysiology : official journal of the International Organization of Psychophysiology</i> . 2018;132(Pt A):39-54. doi:10.1016/j.ijpsycho.2018.01.007. | 113 | 113 | AMSSM |
| Davis-Hayes C, Baker DR, Bottiglieri TS, et al. Medical retirement from sport after concussions: A practical guide for a difficult discussion. <i>Neurology: Clinical Practice</i> . 2018;8(1):40-47. doi:10.1212/CPJ.0000000000000424.                                                                                       | 114 | 114 | AMSSM |
| Black AM, Macpherson AK, Hagel BE, et al. Policy change eliminating body checking in non-elite ice hockey leads to a threefold reduction in injury and concussion risk in 11- and 12-year-old players. <i>British Journal of Sports Medicine</i> . 2016;50(1):55-61. doi:10.1136/bjsports-2015-095103.                        | 115 | 115 | AMSSM |
| Krolkowski MP, Black AM, Palacios-Derflingher L, Blake TA, Schneider KJ, Emery CA. The Effect of the "Zero Tolerance for Head Contact" Rule Change on the Risk of Concussions in Youth Ice Hockey Players. <i>Am J Sports Med</i> . 2017;45(2):468-473. doi:10.1177/0363546516669701.                                         | 116 | 116 | AMSSM |
| Emery CA, Black AM, Kolstad A, et al. What strategies can be used to effectively reduce the risk of concussion in sport? A systematic review. <i>British Journal of Sports Medicine</i> . 2017;51(12):978-984. doi:10.1136/bjsports-2016-097452.                                                                              | 117 | 117 | AMSSM |
| Kerr ZY, Yeargin S, Valovich McLeod TC, et al. Comprehensive Coach Education and Practice Contact Restriction Guidelines Result in Lower Injury Rates in Youth American Football. <i>Orthop J Sports Med</i> . 2015;3(7):232596711559457-232596711559458. doi:10.1177/2325967115594578.                                       | 118 | 118 | AMSSM |
| Kerr ZY, Yeargin SW, Valovich McLeod TC, Mensch J, Hayden R, Dompier TP. Comprehensive Coach Education Reduces Head Impact Exposure in American Youth Football. <i>Orthop J Sports Med</i> . 2015;3(10):2325967115610545. doi:10.1177/2325967115610545.                                                                       | 119 | 119 | AMSSM |
| Resch JE, Brown CN, Schmidt J, et al. The sensitivity and specificity of clinical measures of sport concussion: three tests are better than one. <i>BMJ Open Sport Exerc Med</i> . 2016;2:e000012.                                                                                                                            | 120 | 120 | AMSSM |
| Echlin PS, Tator CH, Cusimano MD, et al. A prospective study of physician-observed concussions during junior ice hockey: implications for incidence rates. <i>Neurosurg Focus</i> . 2010;29(5):E4. doi:10.3171/2010.9.FOCUS10186.                                                                                             | 121 | 121 | AMSSM |
| Broglio SP, Sosnoff JJ, Ferrara MS. The relationship of athlete-reported concussion symptoms and objective measures of neurocognitive function and postural control. <i>Clin J Sport Med</i> . 2009;19(5):377-382. doi:10.1097/JSM.0b013e3181b625fe.                                                                          | 122 | 122 | AMSSM |
| Leong DF, Balcer LJ, Galetta SL, Liu Z, Master CL. The King-Devick test as a concussion screening tool administered by sports parents. <i>J Sports Med Phys Fitness</i> . 2014;54(1):70-77.                                                                                                                                   | 123 | 123 | AMSSM |

## All Papers from All Three Statements (Citation Order)

|                                                                                                                                                                                                                                                                                                                                                                                           |     |     |       |
|-------------------------------------------------------------------------------------------------------------------------------------------------------------------------------------------------------------------------------------------------------------------------------------------------------------------------------------------------------------------------------------------|-----|-----|-------|
| King, D., Gissane, C., Hume, P. A., & Flaws, M. (2015). The King–Devick test was useful in management of concussion in amateur rugby union and rugby league in New Zealand. <i>Journal of the neurological sciences</i> , 351(1-2), 58-64.                                                                                                                                                | 124 | 124 | AMSSM |
| Fuller GW, Cross MJ, Stokes KA, et al. King-Devick concussion test performs poorly as a screening tool in elite rugby union players: a prospective cohort study of two screening tests versus a clinical reference standard. <i>Br J Sports Med</i> . 2018. doi:10.1136/bjsports-2017-098560.                                                                                             | 125 | 125 | AMSSM |
| Hecimovich M, King D, Dempsey AR, Murphy M. The King-Devick test is a valid and reliable tool for assessing sport-related concussion in Australian football: A prospective cohort study. <i>J Sci Med Sport</i> . 2018;21(10):1004-1007. doi:10.1016/j.jsams.2018.03.011.                                                                                                                 | 126 | 126 | AMSSM |
| Eddy R, Goetschius J, Hertel J, Resch J. Test-Retest Reliability and the Effects of Exercise on the King-Devick Test. <i>Clin J Sport Med</i> . 2020;30(3):239-244. doi:10.1097/JSM.0000000000000586.                                                                                                                                                                                     | 127 | 127 | AMSSM |
| Eckner JT, Chandran S, Richardson JK. Investigating the role of feedback and motivation in clinical reaction time assessment. <i>PM R</i> . 2011;3(12):1092-1097. doi:10.1016/j.pmrj.2011.04.022.                                                                                                                                                                                         | 128 | 128 | AMSSM |
| Aubry, M., Cantu, R., Dvorak, J., Graf-Baumann, T., Johnston, K., Kelly, J., et al. (2002). Summary and agreement statement of the First International Conference on Concussion in Sport, Vienna 2001. Recommendations for the improvement of safety and health of athletes who may suffer concussive injuries. (Vol. 36, pp. 6–10). Presented at the British journal of sports medicine. | 1   | 129 | ICCCS |
| McCrorry P Johnston K, Meeuwisse W, et al. Summary and agreement statement of the 2nd international conference on concussion in sport, Prague 2004. <i>Br J Sports Med</i> 2005;39:i78–i86.                                                                                                                                                                                               | 2   | 130 | ICCCS |
| McCrorry P, Meeuwisse W, Johnston K, et al. Consensus statement on concussion in sport - the third international conference on concussion in sport held in Zurich, November 2008. <i>Phys Sportsmed</i> 2009;37:141–59                                                                                                                                                                    | 3   | 131 | ICCCS |
| McCrorry P, Meeuwisse WH, Aubry M, et al. Consensus statement on concussion in sport: the 4th international conference on concussion in sport held in Zurich, november 2012. <i>Br J Sports Med</i> 2013;47:250–8.                                                                                                                                                                        | 4   | 132 | ICCCS |
| Meeuwisse W, Schneider K, Dvorak J, et al. The berlin 2016 process: a summary of methodology for the 5th international consensus conference on concussion in sport. <i>Br J Med</i> 2017. (accepted and in press 22/1/2017).                                                                                                                                                              | 5   | 133 | ICCCS |
| Maddocks D, Dicker G. An objective measure of recovery from concussion in Australian rules footballers. <i>Sport Health</i> 1989;7:6–7.                                                                                                                                                                                                                                                   | 6   | 134 | ICCCS |
| Maddocks DL, Dicker GD, Saling MM. The assessment of orientation following concussion in athletes. <i>Clin J Sport Med</i> 1995;5:32–5.                                                                                                                                                                                                                                                   | 7   | 135 | ICCCS |
| McCrea, M. (2001). Standardized mental status assessment of sports concussion. <i>Clinical Journal of Sport Medicine</i> , 11(3), 176-181.                                                                                                                                                                                                                                                | 8   | 136 | ICCCS |

## All Papers from All Three Statements (Citation Order)

|                                                                                                                                                                                                                                                                |    |     |       |
|----------------------------------------------------------------------------------------------------------------------------------------------------------------------------------------------------------------------------------------------------------------|----|-----|-------|
| McCrea, M., Kelly, J. P., Randolph, C., Kluge, J., Bartolic, E., Finn, G., & Baxter, B. (1998). Standardized assessment of concussion (SAC): on-site mental status evaluation of the athlete. <i>The Journal of head trauma rehabilitation</i> , 13(2), 27-35. | 9  | 137 | ICCCS |
| McCrea M, Randolph C, Kelly J. The Standardized Assessment of Concussion (SAC): Manual for Administration, Scoring and Interpretation. 2nd ed. Waukesha: WI, 2000.                                                                                             | 10 | 138 | ICCCS |
| McCrea, M., Kelly, J. P., Kluge, J., Ackley, B., & Randolph, C. (1997). Standardized assessment of concussion in football players. <i>Neurology</i> , 48(3), 586-588.                                                                                          | 11 | 139 | ICCCS |
| Collie A, Darby D, Maruff P. Computerised cognitive assessment of athletes with sports related head injury. <i>Br J Sports Med</i> 2001;35:297–302.                                                                                                            | 12 | 140 | ICCCS |
| Collie A, Maruff P. Computerised neuropsychological testing. <i>Br J Sports Med</i> 2003;37:2–3.                                                                                                                                                               | 13 | 141 | ICCCS |
| Collie A, Maruff P, McStephen M, et al. Psychometric issues associated with computerised neuropsychological assessment of concussed athletes. <i>Br J Sports Med</i> 2003;37:556–9.                                                                            | 14 | 142 | ICCCS |
| Collins MW, Grindel SH, Lovell MR, et al. Relationship between concussion and neuropsychological performance in college football players. <i>Jama</i> 1999;282:964–70                                                                                          | 15 | 143 | ICCCS |
| Lovell MR. The relevance of neuropsychologic testing for sports-related head injuries. <i>Curr Sports Med Rep</i> 2002;1:7–11.                                                                                                                                 | 16 | 144 | ICCCS |
| Lovell MR, Collins MW. Neuropsychological assessment of the college football player. <i>J Head Trauma Rehabil</i> 1998;13:9–26.                                                                                                                                | 17 | 145 | ICCCS |
| Bleiberg J, Cernich AN, Cameron K, et al. Duration of cognitive impairment after sports concussion. <i>Neurosurgery</i> 2004;54:1073–78–78–80.                                                                                                                 | 18 | 146 | ICCCS |
| Bleiberg J, Warden D. Duration of cognitive impairment after sports concussion. <i>Neurosurgery</i> 2005;56:E1166.                                                                                                                                             | 19 | 147 | ICCCS |
| Broglio SP, Macciocchi SN, Ferrara MS. Neurocognitive performance of concussed athletes when symptom free. <i>J Athl Train</i> 2007;42:504–8.                                                                                                                  | 20 | 148 | ICCCS |
| Broglio SP, Macciocchi SN, Ferrara MS. Sensitivity of the concussion assessment battery. <i>Neurosurgery</i> 2007;60:1050–7–7–8.                                                                                                                               | 21 | 149 | ICCCS |
| Gioia G, Janusz J, Gilstein K, et al. Neuropsychological management of concussion in children and adolescents: effects of age and gender on ImPact. abstract). <i>Br J Sp Med</i> 2004;38:657.                                                                 | 22 | 150 | ICCCS |

## All Papers from All Three Statements (Citation Order)

|                                                                                                                                                                                                                                                                                                          |    |     |       |
|----------------------------------------------------------------------------------------------------------------------------------------------------------------------------------------------------------------------------------------------------------------------------------------------------------|----|-----|-------|
| McCrorry P, Collie A, Anderson V, et al. Can we manage sport related concussion in children the same as in adults? Br J Sports Med 2004;38:516–9.                                                                                                                                                        | 23 | 151 | ICCCS |
| Makdissi M, Schneider K, Feddermann-Demont N, et al. Approach to investigation and treatment of persistent symptoms following sport-related concussion: a systematic review. Br J Sports Med. In Press. 2017.                                                                                            | 24 | 152 | ICCCS |
| Manley, Geoff, Andrew J. Gardner, Kathryn J. Schneider, Kevin M. Guskiewicz, Julian Bailes, Robert C. Cantu, Rudolph J. Castellani et al. "A systematic review of potential long-term effects of sport-related concussion." British journal of sports medicine 51, no. 12 (2017): 969-977. (Updated ref) | 25 | 153 | ICCCS |
| McCrorry P. Preparticipation assessment for head injury. Clin J Sport Med 2004;14:139–44.                                                                                                                                                                                                                | 26 | 154 | ICCCS |
| Johnston KM, Lassonde M, Ptito A. A contemporary neurosurgical approach to sport-related head injury: the McGill concussion protocol. J Am Coll Surg 2001;192:515–24.                                                                                                                                    | 27 | 155 | ICCCS |
| Delaney J, Lacroix V, Leclerc S, et al. Canadian football league season.. Clin J Sport Med 1997;2000:9–14.                                                                                                                                                                                               | 28 | 156 | ICCCS |
| Delaney JS, Lacroix VJ, Leclerc S, et al. Concussions among university football and soccer players. Clin J Sport Med 2002;12:331–8.                                                                                                                                                                      | 29 | 157 | ICCCS |
| Johnston KM, Bloom GA, Ramsay J, et al. Current concepts in concussion rehabilitation. Curr Sports Med Rep 2004;3:316–23.                                                                                                                                                                                | 30 | 158 | ICCCS |
| Denke NJ. Brain injury in sports. J Emerg Nurs 2008;34:363–4.                                                                                                                                                                                                                                            | 31 | 159 | ICCCS |
| Gianotti S, Hume PA. Concussion sideline management intervention for rugby union leads to reduced concussion claims. NeuroRehabilitation 2007;22:181–9.                                                                                                                                                  | 32 | 160 | ICCCS |
| Guilmette TJ, Malia LA, McQuiggan MD. Concussion understanding and management among new England high school football coaches. Brain Inj 2007;21:1039–47.                                                                                                                                                 | 33 | 161 | ICCCS |
| Hootman JM, Dick R, Agel J. Epidemiology of collegiate injuries for 15 sports: summary and recommendations for injury prevention initiatives. J Athl Train 2007;42:311–9.                                                                                                                                | 34 | 162 | ICCCS |
| Valovich McLeod TC, Schwartz C, Bay RC. Sport-related concussion misunderstandings among youth coaches. Clin J Sport Med 2007;17:140–2.                                                                                                                                                                  | 35 | 163 | ICCCS |
| Sye G, Sullivan SJ, McCrorry P. High school rugby players' understanding of concussion and return to play guidelines. Br J Sports Med 2006;40:1003–5.                                                                                                                                                    | 36 | 164 | ICCCS |
| Theye F, Mueller KA. "Heads up": concussions in high school sports. Clin Med Res 2004;2:165–71.                                                                                                                                                                                                          | 37 | 165 | ICCCS |

## All Papers from All Three Statements (Citation Order)

|                                                                                                                                                                                                                                                                  |    |     |       |
|------------------------------------------------------------------------------------------------------------------------------------------------------------------------------------------------------------------------------------------------------------------|----|-----|-------|
| Kashluba S, Paniak C, Blake T, et al. A longitudinal, controlled study of patient complaints following treated mild traumatic brain injury. <i>Arch Clin Neuropsychol</i> 2004;19:805–16.                                                                        | 38 | 166 | ICCCS |
| Gabbe B, Finch CF, Wajswelner H, et al. Does community-level Australian football support injury prevention research? <i>J Sci Med Sport</i> 2003;6:231–6.                                                                                                        | 39 | 167 | ICCCS |
| Kaut KP, DePompei R, Kerr J, et al. Reports of head injury and symptom knowledge among college athletes: implications for assessment and educational intervention. <i>Clin J Sport Med</i> 2003;13:213–21.                                                       | 40 | 168 | ICCCS |
| Davidhizar R, Cramer C. "The best thing about the hospitalization was that the nurses kept me well informed" Issues and strategies of client education. <i>Accid Emerg Nurs</i> 2002;10:149–54                                                                   | 41 | 169 | ICCCS |
| McCroory P. What advice should we give to athletes postconcussion? <i>Br J Sports Med</i> 2002;36:316–8.                                                                                                                                                         | 42 | 170 | ICCCS |
| Bazarian JJ, Veenema T, Brayer AF, et al. Knowledge of concussion guidelines among practitioners caring for children. <i>Clin Pediatr</i> 2001;40:207–12.                                                                                                        | 43 | 171 | ICCCS |
| Langlois JA, Rutland-Brown W, Wald MM. The epidemiology and impact of traumatic brain injury: a brief overview. <i>J Head Trauma Rehabil</i> 2006;21:375–8.                                                                                                      | 44 | 172 | ICCCS |
| Langlois JA, Sattin RW. Traumatic brain injury in the United States: research and programs of the centers for disease control and prevention (CDC). <i>J Head Trauma Rehabil</i> 2005;20:187–8.                                                                  | 45 | 173 | ICCCS |
| Kelly JP, Rosenberg JH. The development of guidelines for the management of concussion in sports. <i>J Head Trauma Rehabil</i> 1998;13:53–65.                                                                                                                    | 46 | 174 | ICCCS |
| Giza CC, Hovda DA. The neurometabolic cascade of concussion. <i>J Athl Train.</i> 2001;36(3):228–235                                                                                                                                                             | 1  | 175 | NATA  |
| Vagnozzi R, Signoretti S, Cristofori L, et al. Assessment of metabolic brain damage and recovery following mild traumatic brain injury: a multicentre, proton magnetic resonance spectroscopic study in concussed patients. <i>Brain.</i> 2010;133(11):3232–3242 | 2  | 176 | NATA  |
| Centers for Disease Control and Prevention. Nonfatal traumatic brain injuries related to sports and recreation activities among persons aged 19 years, United States, 2001–2009. <i>MMWR Morb Mortal Wkly Rep.</i> 2011;60(39):1337–1342                         | 3  | 177 | NATA  |
| Langlois JA, Rutland-Brown W, Wald MM. The epidemiology and impact of traumatic brain injury: a brief overview. <i>J Head Trauma Rehabil.</i> 2006;21(5):375–378.                                                                                                | 4  | 178 | NATA  |
| Guskiewicz KM, Bruce SL, Cantu RC, et al. National Athletic Trainers' Association position statement: management of sport-related concussion. <i>J Athl Train.</i> 2004;39(3):280–297.                                                                           | 5  | 179 | NATA  |



## All Papers from All Three Statements (Citation Order)

|                                                                                                                                                                                                                                                |    |     |      |
|------------------------------------------------------------------------------------------------------------------------------------------------------------------------------------------------------------------------------------------------|----|-----|------|
| American Academy of Neurology. Practice parameter: the management of concussion in sports (summary statement). Report of the Quality Standards Subcommittee. <i>Neurology</i> . 1997;48(3):581–585.                                            | 6  | 180 | NATA |
| McCrorry, Paul, et al. "Consensus statement on concussion in sport—the 4th International Conference on Concussion in Sport held in Zurich, November 2012." <i>PM&amp;R</i> 5.4 (2013): 255-279.                                                | 7  | 181 | NATA |
| Ebell MH, Siwek J, Weiss BD, et al. Strength of recommendation taxonomy (SORT): a patient-centered approach to grading evidence in the medical literature. <i>Am Fam Physician</i> . 2004;69(3):548–556.                                       | 8  | 182 | NATA |
| Lovell MR, Collins MW, Iverson GL, Johnston KM, Bradley JP. Grade 1 or “ding” concussions in high school athletes. <i>Am J Sports Med</i> . 2004;32(1):47–54.                                                                                  | 9  | 183 | NATA |
| Valovich Mcleod TC, Schwartz C, Bay RC. Sport-related concussion misunderstandings among youth coaches. <i>Clin J Sport Med</i> . 2007;17(2):140–142.                                                                                          | 10 | 184 | NATA |
| Sarmiento K, Mitchko J, Klein C, Wong S. Evaluation of the Centers for Disease Control and Prevention’s concussion initiative for high school coaches: “Heads Up: Concussion in High School Sports.” <i>J Sch Health</i> . 2010;80(3):112–118. | 11 | 185 | NATA |
| Glang A, Koester MC, Beaver SV, Clay JE, McLaughlin KA. Online training in sports concussion for youth sports coaches. <i>Int J Sports Sci Coach</i> . 2010;5(1):1–12.                                                                         | 12 | 186 | NATA |
| Schmidt JD, Register-Mihalik JK, Mihalik JP, Kerr ZY, Guskiewicz KM. Identifying impairments after concussion: normative data versus individualized baselines. <i>Med Sci Sports Exerc</i> . 2012;44(9):1621–1628.                             | 13 | 187 | NATA |
| Randolph C. Baseline neuropsychological testing in managing sport-related concussion: does it modify risk? <i>Curr Sports Med Rep</i> . 2011;10(1):21–26.                                                                                      | 14 | 188 | NATA |
| Yakovlev PI, Lecours AR. The myelogenetic cycles of regional maturation of the brain. In: Minkowski A, ed. <i>Regional Development of the Brain in Early Life</i> . Philadelphia, PA: FA Davis; 1967:3–70                                      | 15 | 189 | NATA |
| Hunt TN, Ferrara MS. Age-related differences in neuropsychological testing among high school athletes. <i>J Athl Train</i> 2009;44(4):405–409.                                                                                                 | 16 | 190 | NATA |
| Fields RD. White matter in learning, cognition and psychiatric disorders. <i>Trends Neurosci</i> . 2008;31(7):361–370.                                                                                                                         | 17 | 191 | NATA |
| Broglio SP, Puetz TW. The effect of sport concussion on neurocognitive function, self-report symptoms, and postural control: a meta-analysis. <i>Sports Med</i> . 2008;38(1):53–67.                                                            | 18 | 192 | NATA |
| Broglio SP, Macciocchi SN, Ferrara MS. Sensitivity of the concussion assessment battery. <i>Neurosurgery</i> . 2007;60(6):1050–                                                                                                                | 19 | 193 | NATA |
| McCrea M, Barr WB, Guskiewicz K, et al. Standard regression-based methods for measuring recovery after sport-related concussion. <i>J Int Neuropsychol Soc</i> . 2005;11(1):58–69.                                                             | 20 | 194 | NATA |

## All Papers from All Three Statements (Citation Order)

|                                                                                                                                                                                                                                                                                                                           |    |     |      |
|---------------------------------------------------------------------------------------------------------------------------------------------------------------------------------------------------------------------------------------------------------------------------------------------------------------------------|----|-----|------|
| Moser, R. S., Schatz, P., Neidzowski, K., & Ott, S. D. (2011). Group versus individual administration affects baseline neurocognitive test performance. <i>The American Journal of Sports Medicine</i> , 39(11), 2325–2330. <a href="http://doi.org/10.1177/0363546511417114">http://doi.org/10.1177/0363546511417114</a> | 21 | 195 | NATA |
| McCrea M. Standardized mental status testing on the sideline after sport-related concussion. <i>J Athl Train</i> . 2001;36(3):274–279.                                                                                                                                                                                    | 22 | 196 | NATA |
| McCrea, M. (2001). Standardized mental status assessment of sports concussion. <i>Clinical Journal of Sport Medicine</i> , 11(3), 176–181. <a href="http://doi.org/10.1097/00042752-200107000-00008">http://doi.org/10.1097/00042752-200107000-00008</a>                                                                  | 23 | 197 | NATA |
| Ragan BG, Kang M. Measurement issues in concussion testing. <i>Athl Ther Today</i> . 2007;12(5):2–6.                                                                                                                                                                                                                      | 24 | 198 | NATA |
| Moser RS, Iverson GL, Echemendia RJ, et al. Neuropsychological evaluation in the diagnosis and management of sports-related concussion. <i>Arch Clin Neuropsychol</i> . 2007;22(8):909–916.                                                                                                                               | 25 | 199 | NATA |
| Oliaro S, Anderson S, Hooker D. Management of cerebral concussion in sports: the athletic trainer's perspective. <i>J Athl Train</i> . 2001;36(3):257–262.                                                                                                                                                                | 26 | 200 | NATA |
| Halstead DP. Performance testing updates in head, face, and eye protection. <i>J Athl Train</i> . 2001;36(3):322–327                                                                                                                                                                                                      | 27 | 201 | NATA |
| Herring SA, Cantu RC, Guskiewicz KM, et al; American College of Sports Medicine. Concussion (mild traumatic brain injury) and the team physician: a consensus statement. 2011 update. <i>Med Sci Sports Exerc</i> . 2011;43(12):2412–2422.                                                                                | 28 | 202 | NATA |
| Benson BW, Hamilton GM, Meeuwisse WH, McCrory P, Dvorak J. Is protective equipment useful in preventing concussion? A systematic review of the literature. <i>Br J Sports Med</i> . 2009;43(suppl 1):i56–i67.                                                                                                             | 29 | 203 | NATA |
| Hagel BE, Pless IB, Goulet C, Platt RW, Robitaille Y. Effectiveness of helmets in skiers and snowboarders: case-control and case crossover study. <i>BMJ</i> . 2005;330(7486):281.                                                                                                                                        | 30 | 204 | NATA |
| Mueller BA, Cummings P, Rivara FP, Brooks MA, Terasaki RD. Injuries of the head, face, and neck in relation to ski helmet use. <i>Epidemiology</i> . 2008;19(2):270–276.                                                                                                                                                  | 31 | 205 | NATA |
| Mueller, B. A., Cummings, P., Rivara, F. P., Brooks, M. A., & Terasaki, R. D. (2008). Injuries of the head, face, and neck in relation to ski helmet use. <i>Epidemiology (Cambridge, Mass.)</i> , 19(2), 270–276. <a href="http://doi.org/10.1097/EDE.0b013e318163567c">http://doi.org/10.1097/EDE.0b013e318163567c</a>  | 32 | 206 | NATA |
| Curnow WJ. Bicycle helmets and public health in Australia. <i>Health Promot J Austr</i> . 2008;19(1):10–15.                                                                                                                                                                                                               | 33 | 207 | NATA |
| Hewson PJ. Cycle helmets and road casualties in the UK. <i>Traffic Inj Prev</i> . 2005;6(2):127–134.                                                                                                                                                                                                                      | 34 | 208 | NATA |

## All Papers from All Three Statements (Citation Order)

|                                                                                                                                                                                                                                                   |    |     |      |
|---------------------------------------------------------------------------------------------------------------------------------------------------------------------------------------------------------------------------------------------------|----|-----|------|
| Davidson JA. Epidemiology and outcome of bicycle injuries presenting to an emergency department in the United Kingdom. <i>Eur J Emerg Med.</i> 2005;12(1):24–29.                                                                                  | 35 | 209 | NATA |
| Field M, Collins MW, Lovell MR, Maroon J. Does age play a role in recovery from sports-related concussion? A comparison of high school and collegiate athletes. <i>J Pediatr.</i> 2003;142(5):546–553.                                            | 36 | 210 | NATA |
| Pellman EJ, Lovell MR, Viano DC, Casson IR. Concussion in professional football: recovery of NFL and high school athletes assessed by computerized neuropsychological testing—part 12. <i>Neurosurgery.</i> 2006;58(2):263–274.                   | 37 | 211 | NATA |
| Gioia GA, Schneider JC, Vaughan CG, Isquith PK. Which symptom assessments and approaches are uniquely appropriate for paediatric concussion? <i>Br J Sports Med.</i> 2009;43(suppl 1):i13                                                         | 38 | 212 | NATA |
| Gioia GA, Schneider JC, Vaughan CG, Isquith PK. Which symptom assessments and approaches are uniquely appropriate for paediatric concussion? <i>Br J Sports Med.</i> 2009;43(suppl 1):i13                                                         | 39 | 213 | NATA |
| Yeates KO, Kaizer E, Rusin J, et al. Reliable change in postconcussive symptoms and its functional consequences among children with mild traumatic brain injury. <i>Arch Pediatr Adolesc Med.</i> 2012;166(7):615–622.                            | 40 | 214 | NATA |
| Valovich-Mcleod TC, Bay RC, Lam KC, Chhabra A. Representative baseline values on the Sport Concussion Assessment Tool 2 (SCAT2) in adolescent athletes vary by gender, grade, and concussion history. <i>Am J Sports Med.</i> 2012;40(4):927–933. | 41 | 215 | NATA |
| Valovich McLeod TC, Gioia GA. Cognitive rest: the often neglected aspect of concussion management. <i>Athl Ther Today.</i> 2010;15(2):1–3.                                                                                                        | 42 | 216 | NATA |
| Casa DJ, Guskiewicz KM, Anderson SA, et al. National Athletic Trainers' Association position statement: preventing sudden death in sports. <i>J Athl Train.</i> 2012;47(1):96–118.                                                                | 43 | 217 | NATA |
| McCrorry P. Should we treat concussion pharmacologically? The need for evidence based pharmacological treatment for the concussed athlete. <i>Br J Sports Med.</i> 2002;36(1):3–5.                                                                | 44 | 218 | NATA |
| Meehan WP. Medical therapies for concussion. <i>Clin Sports Med.</i> 2011;30(1):115–124.                                                                                                                                                          | 45 | 219 | NATA |
| Guskiewicz KM, McCrea M, Marshall SW, et al. Cumulative effects associated with recurrent concussion in collegiate football players: the NCAA concussion study. <i>JAMA.</i> 2003;290(19):2549–2555.                                              | 46 | 220 | NATA |
| Guskiewicz KM, Marshall SW, Bailes J, et al. Recurrent concussion and risk of depression in retired professional football players. <i>Med Sci Sports Exerc.</i> 2007;39(6):9                                                                      | 51 | 221 | NATA |
| Saunders RL, Harbaugh RE. The second impact in catastrophic contact-sports head trauma. <i>JAMA.</i> 1984;252(4):538–539.                                                                                                                         | 48 | 222 | NATA |

## All Papers from All Three Statements (Citation Order)

|                                                                                                                                                                                                                                                                                                             |    |     |      |
|-------------------------------------------------------------------------------------------------------------------------------------------------------------------------------------------------------------------------------------------------------------------------------------------------------------|----|-----|------|
| Cantu RC, Voy R. Second impact syndrome: a risk in any contact sport. <i>Phys Sportsmed</i> . 1995;23(6):27–28, 31.                                                                                                                                                                                         | 49 | 223 | NATA |
| Bruce DA, Alavi A, Bilaniuk L, Dolinskas C, Obrist W, Uzzell B. Diffuse cerebral swelling following head injuries in children: the syndrome of “malignant brain edema.” <i>J Neurosurg</i> . 1981;54(2):170–178.                                                                                            | 50 | 224 | NATA |
| Guskiewicz KM, Marshall SW, Bailes J, et al. Recurrent concussion and risk of depression in retired professional football players. <i>Med Sci Sports Exerc</i> . 2007;39(6):903–909.                                                                                                                        | 51 | 225 | NATA |
| Guskiewicz KM, Marshall SW, Bailes J, et al. Association between recurrent concussion and late-life cognitive impairment in retired professional football players. <i>Neurosurgery</i> . 2005;57(4):719–726.                                                                                                | 52 | 226 | NATA |
| McKee AC, Cantu RC, Nowinski CJ, et al. Chronic traumatic encephalopathy in athletes: progressive tauopathy after repetitive head injury. <i>J Neuropathol Exp Neurol</i> . 2009;68(7):709–735.                                                                                                             | 53 | 227 | NATA |
| Covassin T, Elbin RJ, Sarmiento K. Educating coaches about concussion in sports: evaluation of the CDC’s “Heads Up: Concussion in Youth Sports” initiative. <i>J Sch Health</i> . 2012;82(5):233–238.                                                                                                       | 54 | 228 | NATA |
| Chrisman SP, Schiff MA, Rivara FP. Physician concussion knowledge and the effect of mailing the CDC’s “Heads Up” toolkit. <i>Clin Pediatr (Phila)</i> . 2011;50(11):1031–1039.                                                                                                                              | 55 | 229 | NATA |
| Sawyer RJ, Hamdallah M, White D, Pruzan M, Mitchko J, Huitric M. High school coaches’ assessments, intentions to use, and use of a concussion prevention toolkit: Centers for Disease Control and Prevention’s “Heads Up: Concussion In High School Sports.” <i>Health Promot Pract</i> . 2010;11(1):34–43. | 56 | 230 | NATA |
| McCrea M, Hammeke T, Olsen G, Leo P, Guskiewicz K. Unreported concussion in high school football players: implications for prevention. <i>Clin J Sport Med</i> . 2004;14(1):13–17.                                                                                                                          | 57 | 231 | NATA |
| Sefton JM, Pirog K, Capita A, Harackiewicz D, Cordova ML. An examination of factors that influence knowledge and reporting of mild brain injuries in collegiate football. <i>J Athl Train</i> . 2004;39(suppl):S52–S53.                                                                                     | 58 | 232 | NATA |
| Sye G, Sullivan SJ, McCrory P. High school rugby players’ understanding of concussion and return to play guidelines. <i>Br J Sports Med</i> . 2006;40(12):1003–1005.                                                                                                                                        | 59 | 233 | NATA |
| Goodman D, Bradley NL, Paras B, Williamson IJ, Bizzochi J. Video gaming promotes concussion knowledge acquisition in youth hockey players. <i>J Adolesc</i> . 2006;29(3):351–360.                                                                                                                           | 60 | 234 | NATA |
| Bramley H, Patrick K, Lehman E, Silvis M. High school soccer players with concussion education are more likely to notify their coach of a suspected concussion. <i>Clin Pediatr (Phila)</i> . 2012;51(4):332–336.                                                                                           | 61 | 235 | NATA |

## All Papers from All Three Statements (Citation Order)

|                                                                                                                                                                                                       |    |     |      |
|-------------------------------------------------------------------------------------------------------------------------------------------------------------------------------------------------------|----|-----|------|
| Coghlin CJ, Myles BD, Howitt SD. The ability of parents to accurately report concussion occurrence in their bantam-aged minor hockey league children. <i>J Can Chiropr Assoc.</i> 2009;53(4):233–250. | 62 | 236 | NATA |
| Sullivan SJ, Bourne L, Choie S, et al. Understanding of sport concussion by the parents of young rugby players: a pilot study. <i>Clin J Sport Med.</i> 2009;19(3):228–230.                           | 63 | 237 | NATA |
| O'Donoghue EM, Onate JA, Van Lunen B, Peterson CL. Assessment of high school coaches' knowledge of sport-related concussions. <i>Athl Train Sports Health.</i> 2009;1(3):120–132.                     | 64 | 238 | NATA |
| McCrea M, Guskiewicz KM, Marshall SW, et al. Acute effects and recovery time following concussion in collegiate football players: the NCAA concussion study. <i>JAMA.</i> 2003;290(19):2556–2563.     | 65 | 239 | NATA |
| O'Donoghue EM, Onate JA, Van Lunen B, Peterson CL. Assessment of high school coaches' knowledge of sport-related concussions. <i>Athl Train Sports Health.</i> 2009;1(3):120–132.                     | 66 | 240 | NATA |
| Gessel LM, Fields SK, Collins CL, Dick RW, Comstock RD. Concussions among United States high school and collegiate athletes. <i>J Athl Train.</i> 2007;42(4):495–503.                                 | 67 | 241 | NATA |
| Wood RL, McCabe M, Dawkins J. The role of anxiety sensitivity in symptom perception after minor head injury: an exploratory study. <i>Brain Inj.</i> 2011;25(13–14):1296–1299.                        | 68 | 242 | NATA |
| <i>Plevretes v La Salle University</i> , 07–5186 (ED PA 2007).                                                                                                                                        | 69 | 243 | NATA |
| <i>Kampmeier v Nyquist</i> , 553 F2d 296 (2nd Cir 1997).                                                                                                                                              | 70 | 244 | NATA |
| <i>Grube v Bethlehem Area School District</i> , 550 F Supp 418 (ED PA 1981).                                                                                                                          | 71 | 245 | NATA |
| <i>Wright v Columbia University</i> , 520 F Supp 789 (ED PA 1981).                                                                                                                                    | 72 | 246 | NATA |
| <i>Poole v South Plainfield Board of Education</i> , 490 F Supp 948 (D NJ 1980).                                                                                                                      | 73 | 247 | NATA |
| Quandt EF, Mitten MJ, Black JS. Legal liability in covering athletic events. <i>Sports Health.</i> 2009;1(1):84–90.                                                                                   | 74 | 248 | NATA |
| Osborne B. Principles of liability for athletic trainers: managing sport-related concussion. <i>J Athl Train.</i> 2001;36(3):316–321.                                                                 | 75 | 249 | NATA |
| Dobbs DB. <i>Torts and Compensation</i> . 2nd ed. St Paul, MN: West Publishing Co; 1993.                                                                                                              | 76 | 250 | NATA |
| Guskiewicz KM, Pachman SE. Management of sport-related brain injuries: preventing poor outcomes and minimizing the risk for legal liabilities. <i>Athl Train Sports Health.</i> 2010;2(6):248–252.    | 77 | 251 | NATA |
| Ray R. <i>Management Strategies in Athletic Training</i> . 3rd ed. Champaign, IL: Human Kinetics; 2005.                                                                                               | 78 | 252 | NATA |

## All Papers from All Three Statements (Citation Order)

|                                                                                                                                                                                                                                |    |     |      |
|--------------------------------------------------------------------------------------------------------------------------------------------------------------------------------------------------------------------------------|----|-----|------|
| Gill v Tamalpais Union High School District, 2008 A112705 (Cal Ct App).                                                                                                                                                        | 79 | 253 | NATA |
| Pinson v Tennessee, 1995 WL 739820 (Tenn Ct App).                                                                                                                                                                              | 80 | 254 | NATA |
| Melka v Orthopaedic Associates of Wisconsin, 06CV2136 (Wisc Cir Ct 2008).                                                                                                                                                      | 81 | 255 | NATA |
| National Collegiate Athletic Association Injury Surveillance Summary for 15 sports: 1988–1989 through 2003–2004. <i>J Athl Train.</i> 2007;42(2):165–319.                                                                      | 82 | 256 | NATA |
| Elbin RJ, Schatz P, Covassin T. One-year test-retest reliability of the online version of ImPACT in high school athletes. <i>Am J Sports Med.</i> 2011;39(11):2319–2324.                                                       | 83 | 257 | NATA |
| Collie A, Maruff P, Makdissi M, McCrory P, McStephen M, Darby D. CogSport: reliability and correlation with conventional cognitive tests used in postconcussion medical evaluations. <i>Clin J Sport Med.</i> 2003;13(1):28–32 | 84 | 258 | NATA |
| Iverson GL, Lovell MR, Podell K, Collins MW. Reliability and validity of ImPACT. Paper presented at: 31st Annual Conference of the International Neuropsychological Society; February 5–8, 2003; Honolulu, HI.                 | 85 | 259 | NATA |
| Broglio SP, Ferrara MS, Macciocchi SN, Baumgartner TA, Elliott R. Test-retest reliability of computerized concussion assessment programs. <i>J Athl Train.</i> 2007;42(4):509–514.                                             | 86 | 260 | NATA |
| Schatz P. Long-term test-retest reliability of baseline cognitive assessments using ImPACT. <i>Am J Sports Med.</i> 2009;38(1):47–53.                                                                                          | 87 | 261 | NATA |
| Grindel SH. The use, abuse, and future of neuropsychologic testing in mild traumatic brain injury. <i>Curr Sports Med Rep.</i> 2006;5(1):9–14.                                                                                 | 88 | 262 | NATA |
| Echemendia RJ, Herring S, Bailes J. Who should conduct and interpret the neuropsychological assessment in sports-related concussion? <i>Br J Sports Med.</i> 2009;43(suppl 1):i32–i35.                                         | 89 | 263 | NATA |
| Iverson GL, Brooks BL, Ashton VL, Lange RT. Interview versus questionnaire symptom reporting in people with the postconcussion syndrome. <i>J Head Trauma Rehabil.</i> 2010;25(1):23–30.                                       | 90 | 264 | NATA |
| Patel AV, Mihalik JP, Notebaert AJ, Guskiewicz KM, Prentice WE. Neuropsychological performance, postural stability, and symptoms after dehydration. <i>J Athl Train.</i> 2007;42(1):66–75.                                     | 91 | 265 | NATA |
| Williams SJ, Nukada H. Sport and exercise headache, part 2: diagnosis and classification. <i>Br J Sports Med.</i> 1994;28(2):96–100.                                                                                           | 92 | 266 | NATA |
| Sabin MJ, Van Boxtel BA, Nohren MW, Broglio SP. Presence of headache does not influence sideline neurostatus or balance in high school football athletes. <i>Clin J Sport Med.</i> 2011;21(5):411–                             | 93 | 267 | NATA |

## All Papers from All Three Statements (Citation Order)

|                                                                                                                                                                                                                                                    |     |     |      |
|----------------------------------------------------------------------------------------------------------------------------------------------------------------------------------------------------------------------------------------------------|-----|-----|------|
| Piland SG, Motl RW, Ferrara MS, Peterson CL. Evidence for the factorial and construct validity of a self-report concussion symptoms scale. <i>J Athl Train.</i> 2003;38(2):104–112.                                                                | 94  | 268 | NATA |
| Randolph C, Millis S, Barr WB, et al. Concussion symptom inventory: an empirically derived scale for monitoring resolution of symptoms following sport-related concussion. <i>Arch Clin Neuropsychol.</i> 2009;24(3):219–229.                      | 95  | 269 | NATA |
| Catena RD, Van Donkelaar P, Chou LS. Cognitive task effects on gait stability following concussion. <i>Exp Brain Res.</i> 2007;176(1):23–31.                                                                                                       | 96  | 270 | NATA |
| Parker TM, Osternig LR, Van Donkelaar P, Chou LS. Gait stability following concussion. <i>Med Sci Sports Exerc.</i> 2006;38(6):1032–1040.                                                                                                          | 97  | 271 | NATA |
| Guskiewicz KM, Riemann BL, Perrin DH, Nashner LM. Alternative approaches to the assessment of mild head injury in athletes. <i>Med Sci Sports Exerc.</i> 1997;29(suppl 7):S213–S221.                                                               | 98  | 272 | NATA |
| Peterson CL, Ferrara MS, Mrazik M, Piland S, Elliot R. Evaluation of neuropsychological domain scores and postural stability following cerebral concussion in sports. <i>Clin J Sport Med.</i> 2003;13(4):230–237.                                 | 99  | 273 | NATA |
| Guskiewicz KM, Ross SE, Marshall SW. Postural stability and neuropsychological deficits after concussion in collegiate athletes. <i>J Athl Train.</i> 2001;36(3):263–273                                                                           | 100 | 274 | NATA |
| De Monte VE, Geffen GM, May CR, McFarland K, Heath P, Neralic M. The acute effects of mild traumatic brain injury on finger tapping with and without word repetition. <i>J Clin Exp Neuropsychol.</i> 2005;27(2):224–239.                          | 101 | 275 | NATA |
| Broglio SP, Ferrara MS, Sopiartz K, Kelly MS. Reliable change of the sensory organization test. <i>Clin J Sport Med.</i> 2008;18(2):148–154.                                                                                                       | 102 | 276 | NATA |
| Riemann BL, Guskiewicz KM. Effects of mild head injury on postural stability as measured through clinical balance testing. <i>J Athl Train.</i> 2000;35(1):19–25.                                                                                  | 103 | 277 | NATA |
| Riemann BL, Guskiewicz KM, Shields EW. Relationship between clinical and forceplate measures of postural stability. <i>J Sport Rehabil.</i> 1999;8(2):71–82.                                                                                       | 104 | 278 | NATA |
| Broglio SP, Zhu W, Sopiartz K, Park Y. Generalizability theory analysis of balance error scoring system reliability in healthy young adults. <i>J Athl Train.</i> 2009;44(5):497–502.                                                              | 105 | 279 | NATA |
| Valovich TC, Perrin DH, Gansneder BM. Repeat administration elicits a practice effect with the Balance Error Scoring System but not with the Standardized Assessment of Concussion in high school athletes. <i>J Athl Train.</i> 2003;38(1):51–56. | 106 | 280 | NATA |



## All Papers from All Three Statements (Citation Order)

|                                                                                                                                                                                                                                                                                                 |     |     |      |
|-------------------------------------------------------------------------------------------------------------------------------------------------------------------------------------------------------------------------------------------------------------------------------------------------|-----|-----|------|
| Fox ZG, Mihalik JP, Blackburn JT, Battaglini CL, Guskiewicz KM. Return of postural control to baseline after anaerobic and aerobic exercise protocols. <i>J Athl Train.</i> 2008;43(5):456–463.                                                                                                 | 107 | 281 | NATA |
| Broglio SP, Monk A, Sapiar K, Cooper ER. The influence of ankle support on postural control. <i>J Sci Med Sport.</i> 2009;12(3):388–392.                                                                                                                                                        | 108 | 282 | NATA |
| Susco TM, Valovich McLeod TC, Gansneder BM, Shultz SJ. Balance recovers within 20 minutes after exertion as measured by the Balance Error Scoring System. <i>J Athl Train.</i> 2004;39(3):241–246.                                                                                              | 109 | 283 | NATA |
| Wilkins JC, Valovich McLeod TC, Perrin DH, Gansneder BM. Performance on the Balance Error Scoring System decreases after fatigue. <i>J Athl Train.</i> 2004;39(2):156–161.                                                                                                                      | 110 | 284 | NATA |
| Maddocks DL, Dicker GD, Saling MM. The assessment of orientation following concussion in athletes. <i>Clin J Sport Med.</i> 1995;5(1):32–35.                                                                                                                                                    | 111 | 285 | NATA |
| Aubry M, Cantu R, Dvorak J, et al. Summary and agreement statement of the first International Conference on Concussion in Sport, Vienna 2001: recommendations for the improvement of safety and health of athletes who may suffer concussive injuries. <i>Br J Sports Med.</i> 2002;36(1):6–10. | 112 | 286 | NATA |
| Schatz P, Pardini JE, Lovell MR, Collins MW, Podell K. Sensitivity and specificity of the ImpACT test battery for concussion in athletes. <i>Arch Clin Neuropsychol.</i> 2006;21(1):91–99.                                                                                                      | 113 | 287 | NATA |
| Randolph C, McCrea M, Barr WB. Is neuropsychological testing useful in the management of sport-related concussion? <i>J Athl Train.</i> 2005;40(3):139–152.                                                                                                                                     | 114 | 288 | NATA |
| Van Kampen DA, Lovell MR, Pardini JE, Collins MW, Fu FH. The “value added” of neurocognitive testing after sports-related concussion. <i>Am J Sports Med.</i> 2006;34(10):1630–1635.                                                                                                            | 115 | 289 | NATA |
| Maruff P, Thomas E, Cysique L, et al. Validity of the CogState brief battery: relationship to standardized tests and sensitivity to cognitive impairment in mild traumatic brain injury, schizophrenia, and AIDS dementia complex. <i>Arch Clin Neuropsychol.</i> 2009;24(2):165–178.           | 116 | 290 | NATA |
| Schatz P, Moser RS, Solomon GS, Ott SD, Karpf R. Prevalence of invalid computerized baseline neurocognitive test results in high school and collegiate athletes. <i>J Athl Train.</i> 2012;47(3):289–296.                                                                                       | 117 | 291 | NATA |
| Broglio SP, Macciocchi SN, Ferrara MS. Neurocognitive performance of concussed athletes when symptom free. <i>J Athl Train.</i> 2007;42(4):504–508.                                                                                                                                             | 118 | 292 | NATA |
| Fazio VC, Lovell MR, Pardini JE, Collins MW. The relation between post concussion symptoms and neurocognitive performance in concussed athletes. <i>NeuroRehabilitation.</i> 2007;22(3):207–216.                                                                                                | 119 | 293 | NATA |
| Broglio SP, Guskiewicz KM. Concussion in sports: the sideline assessment. <i>Sports Health.</i> 2009;1(5):361–369.                                                                                                                                                                              | 120 | 294 | NATA |

## All Papers from All Three Statements (Citation Order)

|                                                                                                                                                                                                                                                                                                                          |     |     |      |
|--------------------------------------------------------------------------------------------------------------------------------------------------------------------------------------------------------------------------------------------------------------------------------------------------------------------------|-----|-----|------|
| Guskiewicz KM, Broglio SP. Sport-related concussion: on-field and sideline assessment. <i>Phys Med Rehabil Clin N Am</i> . 2011;22(4):603–617.                                                                                                                                                                           | 121 | 295 | NATA |
| Gonzalez PG, Walker MT. Imaging modalities in mild traumatic brain injury and sports concussion. <i>PM R</i> . 2011;3(10 suppl 2):S413–S424.                                                                                                                                                                             | 122 | 296 | NATA |
| Vagnozzi R, Signoretti S, Tavazzi B, et al. Temporal window of metabolic brain vulnerability to concussion: a pilot 1H-magnetic resonance spectroscopy study in concussed athletes, part III. <i>Neurosurgery</i> . 2008;62(6):1286–1295.                                                                                | 123 | 297 | NATA |
| Undén J, Romner B. Can low serum levels of S100B predict normal CT findings after minor head injury in adults? An evidence-based review and meta-analysis. <i>J Head Trauma Rehabil</i> . 2010;25(4):228–240.                                                                                                            | 124 | 298 | NATA |
| Greenwald RM, Gwin JT, Chu JJ, Crisco JJ. Head impact severity measures for evaluating mild traumatic brain injury risk exposure. <i>Neurosurgery</i> . 2008;62(4):789–798.                                                                                                                                              | 125 | 299 | NATA |
| Broglio SP, Schnebel B, Sosnoff JJ, et al. Biomechanical properties of concussions in high school football. <i>Med Sci Sports Exerc</i> . 2010;42(11):2064–2071.                                                                                                                                                         | 126 | 300 | NATA |
| Guskiewicz KM, Mihalik JP, Shankar V, et al. Measurement of head impacts in collegiate football players: relationship between head impact biomechanics and acute clinical outcome after concussion. <i>Neurosurgery</i> . 2007;61(6):1244–1252.                                                                          | 127 | 301 | NATA |
| Broglio SP, Eckner JT, Surma T, Kutcher JS. Post-concussion cognitive declines and symptomatology are not related to concussion biomechanics in high school football players. <i>J Neurotrauma</i> . 2011;28(10):2061–2068.                                                                                              | 128 | 302 | NATA |
| Hinton-Bayre AD, Geffen G. Severity of sports-related concussion and neuropsychological test performance. <i>Neurology</i> . 2002;59(7):1068–1070.                                                                                                                                                                       | 129 | 303 | NATA |
| Majerske CW, Mihalik JP, Ren D, et al. Concussion in sports: postconcussive activity levels, symptoms, and neurocognitive performance. <i>J Athl Train</i> . 2008;43(3):265–274.                                                                                                                                         | 130 | 304 | NATA |
| Silverberg ND, Iverson GL. Is rest after concussion “the best medicine”? recommendations for activity resumption following concussion in athletes, civilians, and military service members. <i>J Head Trauma Rehabil</i> . 2013;28(4):250–259.                                                                           | 131 | 305 | NATA |
| Covassin T, Elbin RJ, Harris W, Parker T, Kontos A. The role of age and sex in symptoms, neurocognitive performance, and postural stability in athletes after concussion. <i>Am J Sports Med</i> . 2012;40(6):1303–1312.                                                                                                 | 132 | 306 | NATA |
| World Health Organisation. ICD-10 classifications of mental and behavioural disorder: clinical descriptions and diagnostic guide- lines. <a href="http://www.who.int/classifications/icd/en/bluebook.pdf">http://www.who.int/classifications/icd/en/bluebook.pdf</a> . Published January 1992. Accessed August 29, 2013. | 133 | 307 | NATA |
| McGrath N, Dinn WM, Collins MW, Lovell MR, Elbin RJ, Kontos AP. Post-exertion neurocognitive test failure among student-athletes following concussion. <i>Brain Inj</i> . 2013;27(1):103–113.                                                                                                                            | 134 | 308 | NATA |

## All Papers from All Three Statements (Citation Order)

|                                                                                                                                                                                                           |     |     |      |
|-----------------------------------------------------------------------------------------------------------------------------------------------------------------------------------------------------------|-----|-----|------|
| Wisniewski JF, Guskiewicz KM, Trope M, Sigurdsson A. Incidence of cerebral concussions associated with type of mouthguard used in college football. <i>Dent Traumatol.</i> 2004;20(3):143–149.            | 135 | 309 | NATA |
| Barbic D, Pater J, Brison RJ. Comparison of mouth guard designs and concussion prevention in contact sports: a multicenter randomized controlled trial. <i>Clin J Sport Med.</i> 2005;15(5):294–298       | 136 | 310 | NATA |
| Finch C, Braham R, McIntosh A, McCrory P, Wolfe R. Should football players wear custom fitted mouthguards? Results from a group randomised controlled trial. <i>Inj Prev.</i> 2005;11(4):242–246.         | 137 | 311 | NATA |
| Blignaut JB, Carstens IL, Lombard CJ. Injuries sustained in rugby by wearers and non-wearers of mouthguards. <i>Br J Sports Med.</i> 1987;21(2):5–7.                                                      | 138 | 312 | NATA |
| Marshall SW, Loomis DP, Waller AE, et al. Evaluation of protective equipment for prevention of injuries in rugby union. <i>Int J Epidemiol.</i> 2005;34(1):113–118.                                       | 139 | 313 | NATA |
| Benson BW, Meeuwisse WH. Ice hockey injuries. <i>Med Sport Sci.</i> 2005;49:86–119.                                                                                                                       | 140 | 314 | NATA |
| Labella CR, Smith BW, Sigurdsson A. Effect of mouthguards on dental injuries and concussions in college basketball. <i>Med Sci Sports Exerc.</i> 2002;34(1):41–44.                                        | 141 | 315 | NATA |
| Mihalik JP, McCaffrey MA, Rivera EM, et al. Effectiveness of mouthguards in reducing neurocognitive deficits following sports-related cerebral concussion. <i>Dent Traumatol.</i> 2007;23(1):14–20.       | 142 | 316 | NATA |
| Kemp SP, Hudson Z, Brooks JH, Fuller CW. The epidemiology of head injuries in English professional rugby union. <i>Clin J Sport Med.</i> 2008;18(3):227–234.                                              | 143 | 317 | NATA |
| McIntosh AS, McCrory P. Effectiveness of headgear in a pilot study of under 15 rugby union football. <i>Br J Sports Med.</i> 2001;35(3):167–169.                                                          | 144 | 318 | NATA |
| Kahanov L, Dusa MJ, Wilkinson S, Roberts J. Self-reported headgear use and concussions among collegiate men's rugby union players. <i>Res Sports Med.</i> 2005;13(2):77–89.                               | 145 | 319 | NATA |
| Broglio SP, Ju YY, Broglio MD, Sell TC. The efficacy of soccer 36. headgear. <i>J Athl Train.</i> 2003;38(3):220–224.                                                                                     | 146 | 320 | NATA |
| Withnall C, Shewchenko N, Wonnacott M, Dvorak J. Effectiveness of headgear in football. <i>Br J Sports Med.</i> 2005;39(suppl 1):i40–i48.                                                                 | 147 | 321 | NATA |
| Hrysomallis C. Impact energy attenuation of protective football headgear against a yielding surface. <i>J Sci Med Sport.</i> 2004;7(2):156–164.                                                           | 148 | 322 | NATA |
| Delaney JS, Al-Kashmiri A, Drummond R, Correa JA. The effect of protective headgear on head injuries and concussions in adolescent football (soccer) players. <i>Br J Sports Med.</i> 2008;42(2):110–115. | 149 | 323 | NATA |
| Bakhos LL, Lockhart GR, Myers R, Linakis JG. Emergency department visits for concussion in young child athletes. <i>Pediatrics.</i> 2010;126(3):e550–e556.                                                | 150 | 324 | NATA |

## All Papers from All Three Statements (Citation Order)

|                                                                                                                                                                                                                                                                     |     |     |      |
|---------------------------------------------------------------------------------------------------------------------------------------------------------------------------------------------------------------------------------------------------------------------|-----|-----|------|
| Powell JW, Barber-Foss KD. Traumatic brain injury in high school athletes. <i>JAMA</i> . 1999;282(10):958–963.                                                                                                                                                      | 151 | 325 | NATA |
| Giedd JN. The teen brain: insights from neuroimaging. <i>J Adolesc Health</i> . 2008;42(4):335–343.                                                                                                                                                                 | 152 | 326 | NATA |
| Giedd JN, Blumenthal J, Jefferies NO, et al. Brain development during childhood and adolescence: a longitudinal MRI study. <i>Nat Neurosci</i> . 1999;2(10):861–863.                                                                                                | 153 | 327 | NATA |
| Webbe FM, Barth JT. Short-term and long-term outcome of athletic closed head injuries. <i>Clin Sports Med</i> . 2003;22(3):577–592.                                                                                                                                 | 154 | 328 | NATA |
| McKeever CK, Schatz P. Current issues in the identification, assessment, and management of concussions in sports-related injuries. <i>Appl Neuropsychol</i> . 2003;10(1):4–11.                                                                                      | 155 | 329 | NATA |
| Buzzini SR, Guskiewicz KM. Sport-related concussion in the young athlete. <i>Curr Opin Pediatr</i> . 2006;18(4):376–382.                                                                                                                                            | 156 | 330 | NATA |
| Shaw NA. The neurophysiology of concussion. <i>Prog Neurobiol</i> . 2002;67(4):281–344.                                                                                                                                                                             | 157 | 331 | NATA |
| Fischer KW, Rose SP. Dynamic growth cycles of brain and cognitive development. In: Thatcher RW, Lyon GR, Rumsey J, Krasnegor N, eds. <i>Developmental Neuroimaging: Mapping the Development of Brain and Behavior</i> . New York, NY: Academic Press; 1996:263–279. | 158 | 332 | NATA |
| Thomas R, Taylor K. Assessing head injuries in children. <i>MCN Am J Matern Child Nurs</i> . 1997;22(4):198–202.                                                                                                                                                    | 159 | 333 | NATA |
| Levin HS. Neuroplasticity following non-penetrating traumatic brain injury. <i>Brain Inj</i> . 2003;17(8):665–674.                                                                                                                                                  | 160 | 334 | NATA |
| Ewing-Cobbs L, Barnes MA, Fletcher JM. Early brain injury in children: development and reorganization of cognitive function. <i>Dev Neuropsychol</i> . 2003;24(2–3):669–704.                                                                                        | 161 | 335 | NATA |
| Kirkwood MW, Yeates KO, Wilson PE. Pediatric sport-related concussion: a review of the clinical management of an oft-neglected population. <i>Pediatrics</i> . 2006;117(4):1359–1371.                                                                               | 162 | 336 | NATA |
| Moser RS, Schatz P, Jordan BD. Prolonged effects of concussion in high school athletes. <i>Neurosurgery</i> . 2005;57(2):300–306.                                                                                                                                   | 163 | 337 | NATA |
| Sim A, Terrberry-Spohr L, Wilson KR. Prolonged recovery of memory functioning after mild traumatic brain injury in adolescent athletes. <i>J Neurosurg</i> . 2008;108(3):511–516.                                                                                   | 164 | 338 | NATA |
| McCroory PR. Does second impact syndrome exist? <i>Clin J Sport Med</i> . 2001;11(3):144–149.                                                                                                                                                                       | 165 | 339 | NATA |
| Cassidy JD, Carroll LJ, Peloso PM, et al; WHO Collaborating Centre Task Force on Mild Traumatic Brain Injury. Incidence, risk factors, and                                                                                                                          | 166 | 340 | NATA |

## All Papers from All Three Statements (Citation Order)

|                                                                                                                                                                                                                                                     |     |     |      |
|-----------------------------------------------------------------------------------------------------------------------------------------------------------------------------------------------------------------------------------------------------|-----|-----|------|
| prevention of mild traumatic brain injury: results of the WHO Collaborating Centre Task Force on Mild Traumatic Brain Injury. <i>J Rehabil Med.</i> 2004;(suppl 43):28–60.                                                                          |     |     |      |
| Bruce DA. Delayed deterioration of consciousness after trivial head injury in childhood. <i>Br Med J (Clin Res Ed).</i> 1984;289(6447):715–716                                                                                                      | 167 | 341 | NATA |
| Snoek JW, Minderhoud JM, Wilink JT. Delayed deterioration following mild head injury in children. <i>Brain.</i> 1984;107(pt 1):15–16                                                                                                                | 168 | 342 | NATA |
| Halstead ME, Walter KD; Council on Sports Medicine and Fitness, American Academy of Pediatrics. Clinical report: sport- related concussion in children and adolescents. <i>Pediatrics.</i> 2010;126(3):597–615.                                     | 169 | 343 | NATA |
| Alla S, Sullivan SJ, Hale L, McCrory PR. Self-report scales/ checklists for the measurement of concussion symptoms: a systematic review. <i>Br J Sports Med.</i> 2009;43(suppl 1):i3–i12.                                                           | 170 | 344 | NATA |
| Mailer BJ, Valovich-Mcleod TC, Bay RC. Healthy youth are reliable in reporting symptoms on a graded symptom scale. <i>J Sport Rehabil.</i> 2008;17(1):11–20.                                                                                        | 171 | 345 | NATA |
| Gioia GA, Collins MW, Isquith PK. Improving identification and diagnosis of mild traumatic brain injury with evidence: psycho- metric support for the acute concussion evaluation. <i>J Head Trauma Rehabil.</i> 2008;23(4):230–242.                | 172 | 346 | NATA |
| Lovell MR, Iverson GL, Collins MW, et al. Measurement of symptoms following sports-related concussion: reliability and normative data for the post-concussion scale. <i>Appl Neuropsychol.</i> 2006;13(3):166–174.                                  | 173 | 347 | NATA |
| Yeates KO, Luria J, Bartkowski H, Rusin J, Martin L, Bigler ED. Postconcussive symptoms in children with mild closed head injuries. <i>J Head Trauma Rehabil.</i> 1999;14(4):337–350.                                                               | 174 | 348 | NATA |
| Valovich McLeod TC, Barr WB, McCrean M, Guskiewicz KM. Psychometric and measurement properties of concussion assess- ment tools in youth sports. <i>J Athl Train.</i> 2006;41(4):399–408.                                                           | 175 | 349 | NATA |
| McCrory PR, Collie A, Anderson V, Davis G. Can we manage sport related concussion in children the same as in adults? <i>Br J Sports Med.</i> 2004;38(5):516–519.                                                                                    | 176 | 350 | NATA |
| Kirkwood MW, Randolph C, Yeates KO. Returning pediatric athletes to play after concussion: the evidence (or lack thereof) behind baseline neuropsychological testing. <i>Acta Paediatr.</i> 2009;98(9):1409–1411.                                   | 177 | 351 | NATA |
| Canadian Paediatric Society. Identification and management of children with sport-related concussion. <i>Paediatr Child Health.</i> 2006;11(7):420–428.                                                                                             | 178 | 352 | NATA |
| Purcell L. What are the most appropriate return-to-play guidelines for concussed child athletes? <i>Br J Sports Med.</i> 2009;43(suppl 1):i51–i55.                                                                                                  | 179 | 353 | NATA |
| Valovich-Mcleod TC, Bay RC, Lam KC, Chhabra A. Represen- tative baseline values on the Sport Concussion Assessment Tool 2 (SCAT2) in adolescent athletes vary by gender, grade, and concussion history. <i>Am J Sports Med.</i> 2012;40(4):927–933. | 180 | 354 | NATA |

## All Papers from All Three Statements (Citation Order)

|                                                                                                                                                                                                                                                                                                                                                                                                           |     |     |      |
|-----------------------------------------------------------------------------------------------------------------------------------------------------------------------------------------------------------------------------------------------------------------------------------------------------------------------------------------------------------------------------------------------------------|-----|-----|------|
| McCrorry P, Johnston K, Meeuwisse W, et al. Summary and agreement statement of the 2nd International Conference on                                                                                                                                                                                                                                                                                        | 181 | 355 | NATA |
| Schulz MR, Marshall SW, Mueller FO, et al. Incidence and risk factors for concussion in high school athletes, North Carolina, 1996–1999. <i>Am J Epidemiol.</i> 2004;160(10):937–944.                                                                                                                                                                                                                     | 182 | 356 | NATA |
| Cantu RC, Register-Mihalik JK. Considerations for return-to-play and retirement decisions after concussion. <i>PM R.</i> 2011;3(10 suppl 2):S440–S444.                                                                                                                                                                                                                                                    | 183 | 357 | NATA |
| Broglio SP, Ferrara MS, Piland SG, Anderson RB, Collie A. Concussion history is not a predictor of computerized neurocognitive performance. <i>Br J Sports Med.</i> 2006;40(9):802–805.                                                                                                                                                                                                                   | 184 | 358 | NATA |
| Collie A, McCrorry P, Makdissi M. Does history of concussion affect current cognitive status? <i>Br J Sports Med.</i> 2006;40(6):550–551.                                                                                                                                                                                                                                                                 | 185 | 359 | NATA |
| Iverson GL, Brooks BL, Lovell MR, Collins MW. No cumulative effects for one or two previous concussions. <i>Br J Sports Med.</i> 2006;40(1):72–75.                                                                                                                                                                                                                                                        | 186 | 360 | NATA |
| De Beaumont L, Theoret H, Mongeon D, et al. Brain function decline in healthy retired athletes who sustained their last sports concussion in early adulthood. <i>Brain.</i> 2009;132(pt 3):695–708.                                                                                                                                                                                                       | 187 | 361 | NATA |
| Elleberg D, Leclerc S, Couture S, Daigle C. Prolonged neuropsychological impairments following a first concussion in female university soccer athletes. <i>Clin J Sport Med.</i> 2007;17(5):369–374.                                                                                                                                                                                                      | 188 | 362 | NATA |
| Breedlove EL, Robinson M, Talavage TM, et al. Biomechanical correlates of symptomatic and asymptomatic neurophysiological impairment in high school football. <i>J Biomech.</i> 2012;45(7):1265–1272.                                                                                                                                                                                                     | 189 | 363 | NATA |
| Talavage TM, Nauman E, Breedlove EL, et al. Functionally- detected cognitive impairment in high school football players without clinically-diagnosed concussion. <i>J Neurotrauma.</i> <a href="http://online.liebertpub.com/doi/full/10.1089/neu.2010.1512">http:// online.liebertpub.com/doi/full/10.1089/neu.2010.1512</a> . Published online ahead of print April 11, 2013. Accessed August 30, 2013. | 190 | 364 | NATA |
| Bazarian JJ, Zhu T, Blyth B, Borrino A, Zhong J. Subject-specific changes in brain white matter on diffusion tensor imaging after sports-related concussion. <i>Magn Reson Imaging.</i> 2012;30(2):171–                                                                                                                                                                                                   | 191 | 365 | NATA |
| Broglio SP, Pontifex MB, O'Connor P, Hillman CH. The persistent effects of concussion on neuroelectric indices of attention. <i>J Neurotrauma.</i> 2009;26(9):1463–1470.                                                                                                                                                                                                                                  | 192 | 366 | NATA |
| Pontifex MB, O'Connor PM, Broglio SP, Hillman CH. The association between mild traumatic brain injury history and cognitive control. <i>Neuropsychologia.</i> 2009;47(14):3210–3216.                                                                                                                                                                                                                      | 193 | 367 | NATA |

## All Papers from All Three Statements (Citation Order)

|                                                                                                                                                                                                |     |     |      |
|------------------------------------------------------------------------------------------------------------------------------------------------------------------------------------------------|-----|-----|------|
| Gaetz M, Goodman D, Weinberg H. Electrophysiological evidence for the cumulative effects of concussion. <i>Brain Inj.</i> 2000;14(12):1077–1088.                                               | 194 | 368 | NATA |
| Dupuis F, Johnston KM, Lavoie M, Lepore F, Lassonde M. Concussion in athletes produce brain dysfunction as revealed by event-related potentials. <i>Neuroreport.</i> 2000;11(18):4087–4092.    | 195 | 369 | NATA |
| Sosnoff JJ, Broglio SP, Shin S, Ferrara MS. Previous mild traumatic brain injury and postural control dynamics. <i>J Athl Train.</i> 2011;46(1):85–91.                                         | 196 | 370 | NATA |
| Martini DN, Sabin MJ, DePesa SA, et al. The chronic effects of concussion on gait. <i>Arch Phys Med Rehabil.</i> 2011;92(4):585–589.                                                           | 197 | 371 | NATA |
| Gavett BE, Stern RA, McKee AC. Chronic traumatic encephalopathy: a potential late effect of sport-related concussive and subconcussive head trauma. <i>Clin Sports Med.</i> 2011;30(1):179–188 | 198 | 372 | NATA |
| Omalu BI, DeKosky ST, Hamilton RL, et al. Chronic traumatic encephalopathy in a National Football League player, part II. <i>Neurosurgery.</i> 2006;59(5):1086–1092.                           | 199 | 373 | NATA |
| Omalu BI, DeKosky ST, Minster RL, Kamboh MI, Hamilton RL, Wecht CH. Chronic traumatic encephalopathy in a National Football League player. <i>Neurosurgery.</i> 2005;57(1):128–134.            | 200 | 374 | NATA |
| Broglio SP, Eckner JT, Paulson H, Kutcher JS. Cognitive decline and aging: the role of concussive and sub-concussive impacts. <i>Exerc Sport Sci Rev.</i> 2012;40(3):138–144.                  | 201 | 375 | NATA |
|                                                                                                                                                                                                |     |     |      |
