# Supplementary material for: Under-representation of female athletes in research informing influential concussion consensus and position statements: an evidence review and synthesis
Source: HighWire-hosted journal article supplement (doi:10.1136/bjsports-2021-105045), 2022-07-18
Supplement: bjsports-2021-105045supp003_data_supplement.pdf [file bjsports-2021-105045supp003_data_supplement.pdf]

**BJSM Multiple Choice Questions:**

## Multiple Choice Questions

1. )The three organizations with the most cited consensus and position statements on concussion are – in their most current edition:
  - a) International Conference on Concussion in Sport (ICCS, 2017)
  - b) National Athletic Trainers' Association (NATA, 2014)
  - c) American Medical Society for Sports Medicine (AMSSM, 2019)
  - d) All of the above.**
  
- 2.) The consensus and position statements from these three organizations currently cite 171 studies that use human subjects data. Roughly what percentage of these studies use ALL MALE data:
  - a) 20%
  - b) 25%
  - c) 30%
  - d) 35%
  - e) 40%**
  
- 3.) The consensus and position statements from these three organizations currently cite 171 studies that use human subjects data. Roughly what percentage of these studies use ALL FEMALE data:
  - a) 0%
  - b) 1%**
  - c) 2%
  - d) 3%
  - e) 4%
  
4. ) Which of the following are recommendations from the authorship group on how to foster greater inclusivity of women in concussion research data:
  - a) Balancing the representation of females and males on consensus and position statement voting and authorship teams – as well as within editorial boards and program management.
  - b) Female athlete-focused sections of consensus and position statements should be included until the literature is robust enough for a standalone document for this population.
  - c) Consensus and position statements should acknowledge when predominantly male samples inform recommendations.
  - d) Include a checkpoint within consensus/position statement processes for ensuring that cited research is as balanced as possible (similar to NIH's "Inclusion of Women & Minorities" requirements).
  - e) All of the above**
  
- 5.)Which of the three concussion consensus and position statements included studies that *showed a statistically-significant skew* to represent fewer women in concussion data?
  - a) International Conference on Concussion in Sport (ICCS, 2017),
  - b) National Athletic Trainers' Association (NATA, 2014)
  - c) American Medical Society for Sports Medicine (AMSSM, 2019)

**d) All of the above.**
